# Supplementary material for: Interaction Map and Selection of microRNA Targets in Parkinson′s Disease‐Related Genes
Source: Hindawi journal article supplement (doi:10.1155/2009/363145), 2009-01-01
Supplement: f1 [file 363145.f1.pdf]

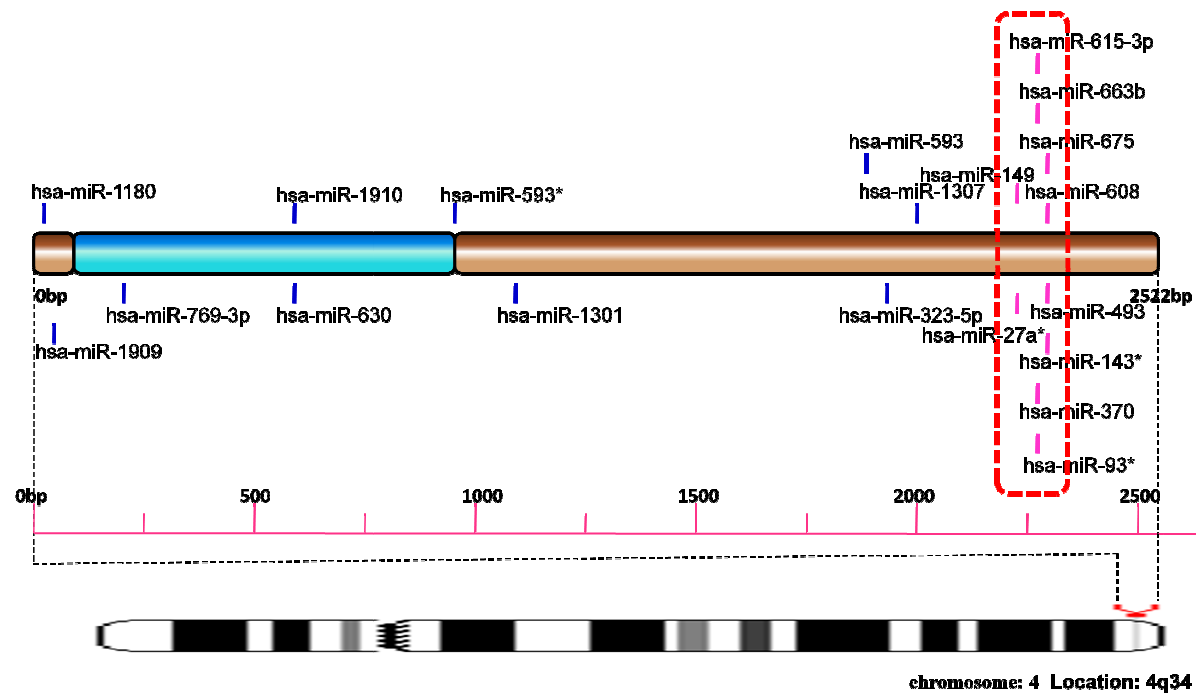

**Fig SF1- Schematic representation of miRNA targets on CASP3**

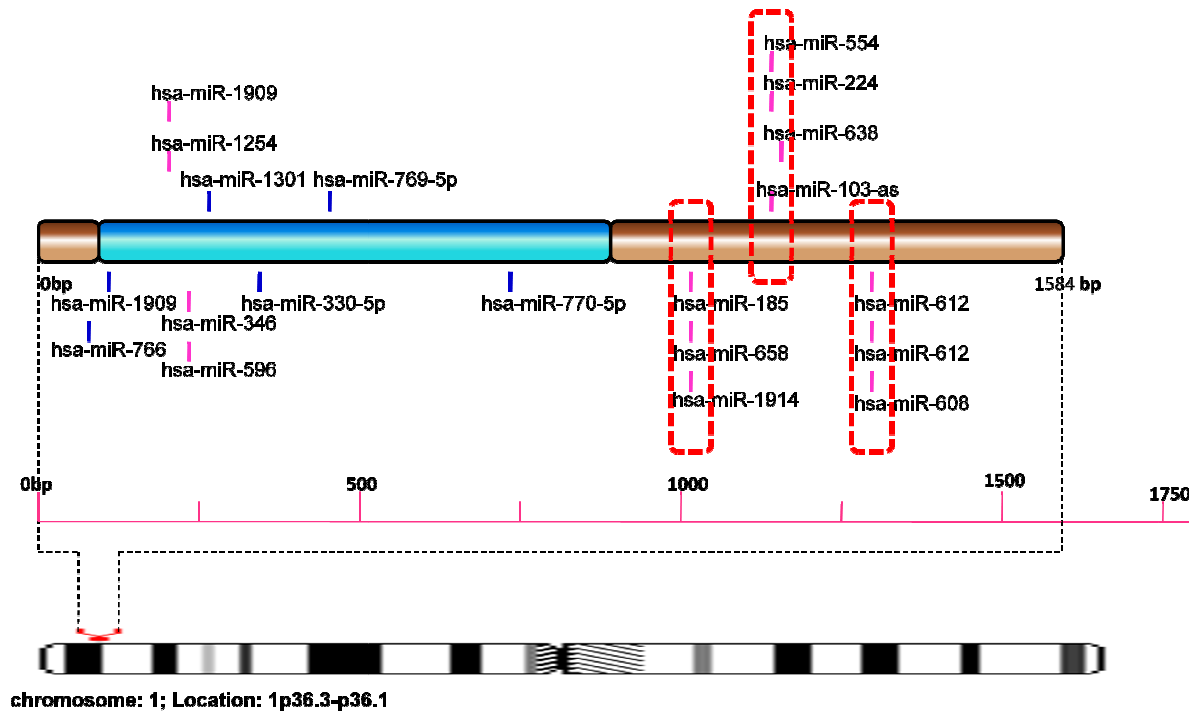

**Fig SF2- Schematic representation of miRNA targets on CASP9**

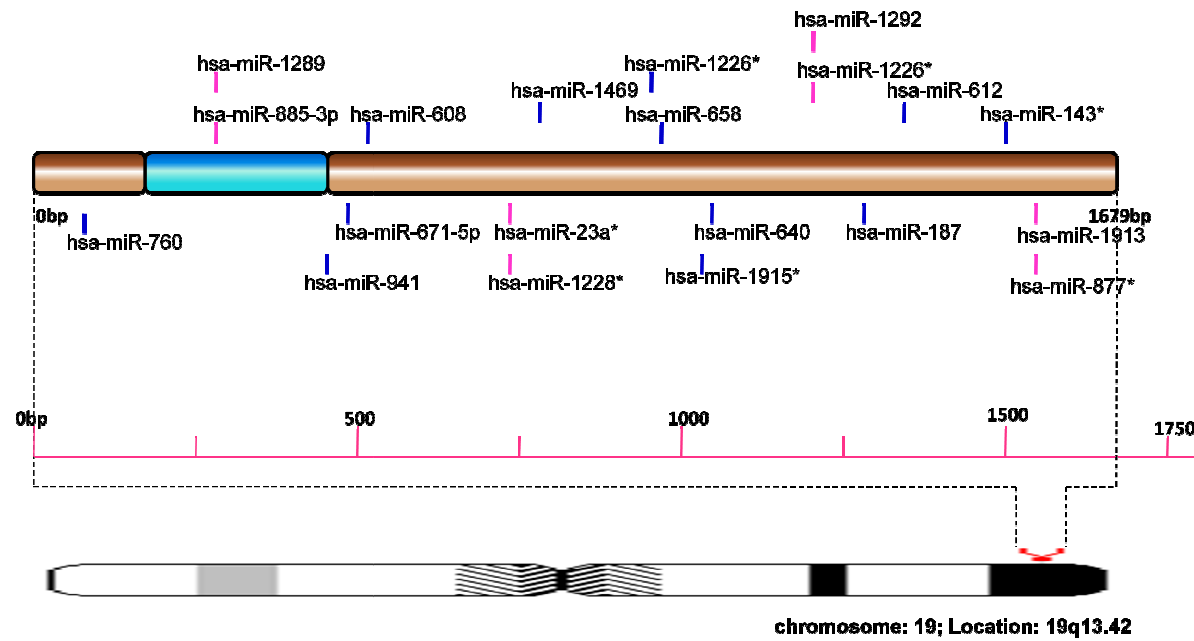

**Fig SF3 - Schematic representation of miRNA targets on COX6B2**

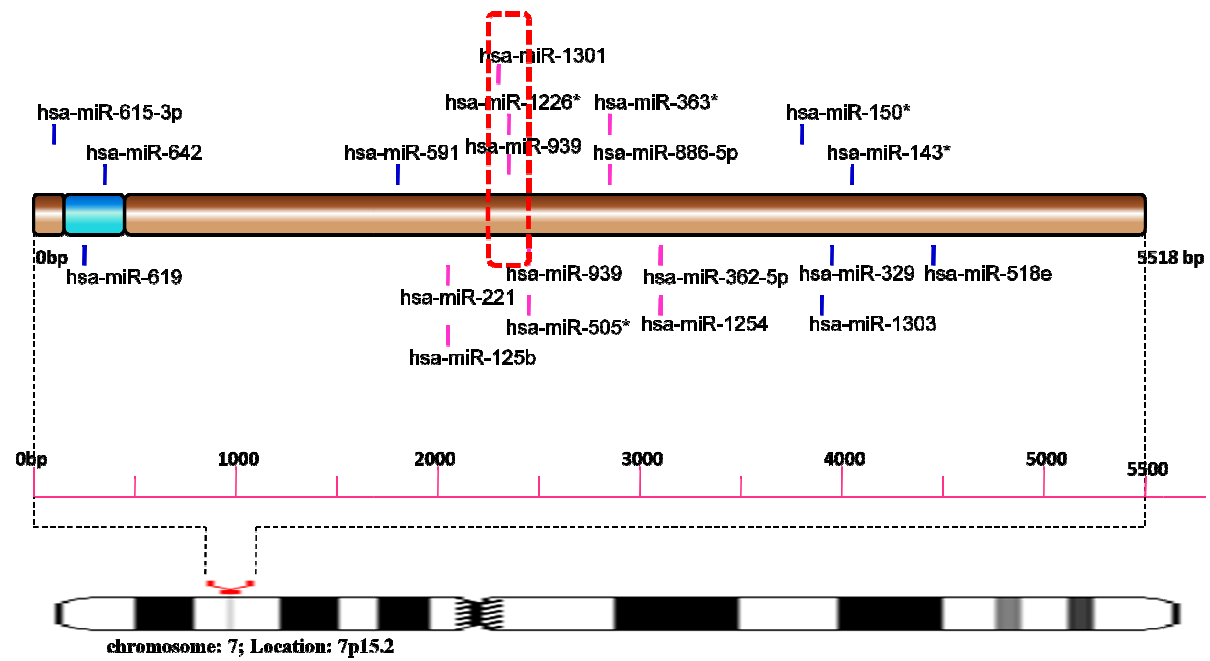

**Fig SF4- Schematic representation of miRNA targets on CYCS**



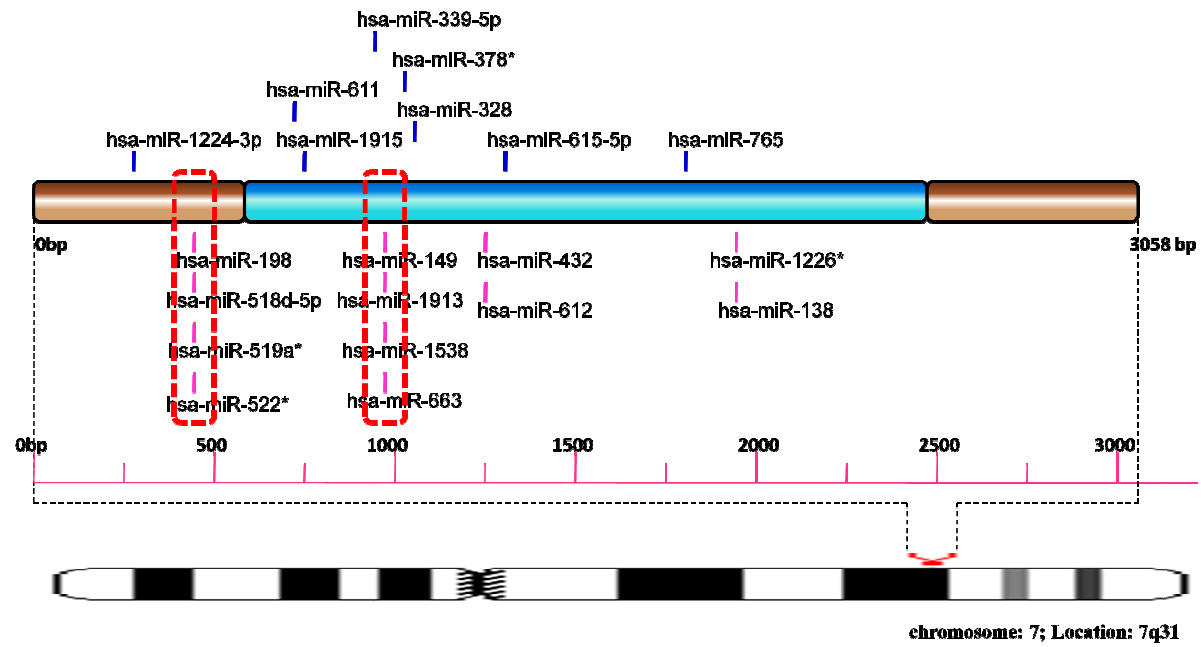

**Fig SF5- Schematic representation of miRNA targets on GPR37**

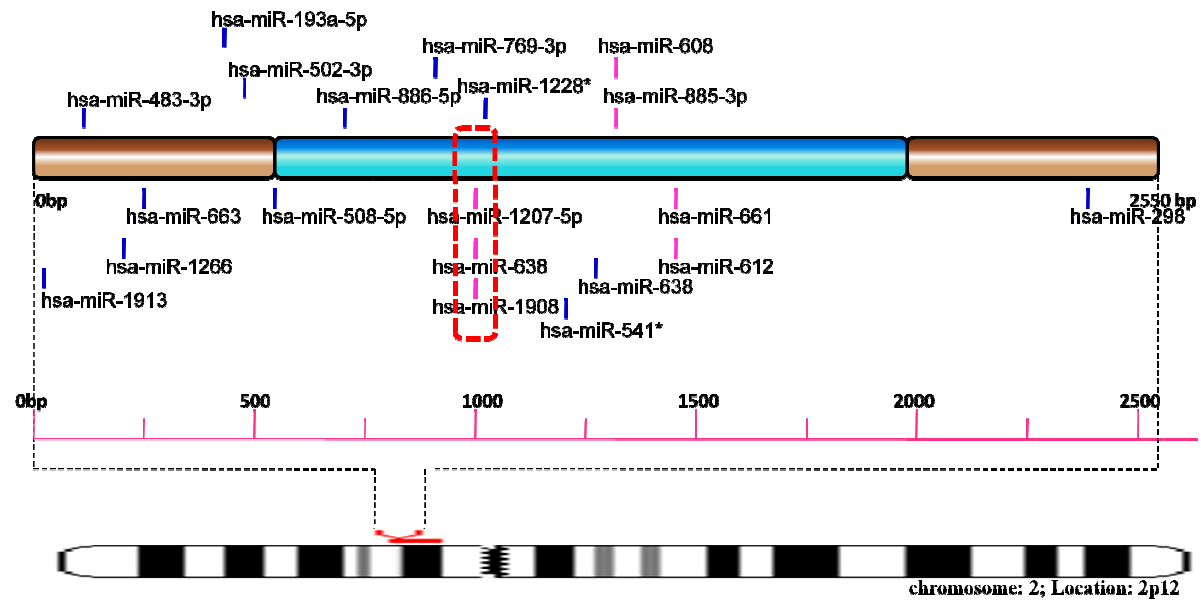

**Fig SF6- Schematic representation of miRNA targets on HTRA2**

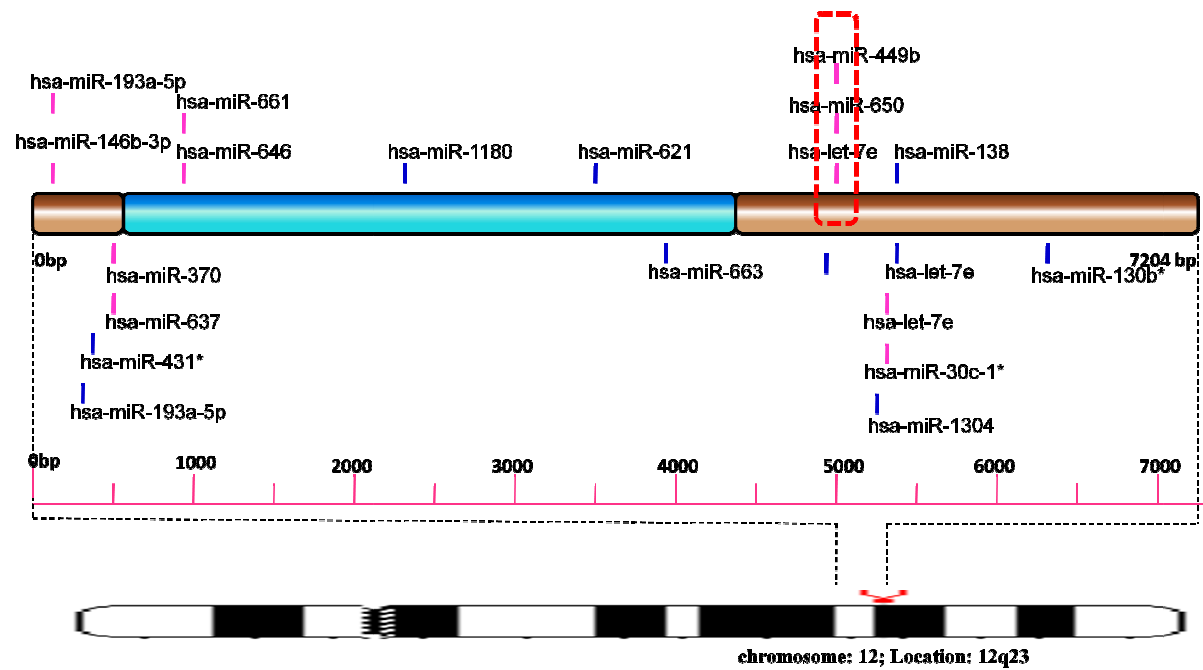

**Fig SF7- Schematic representation of miRNA targets on APAF1**

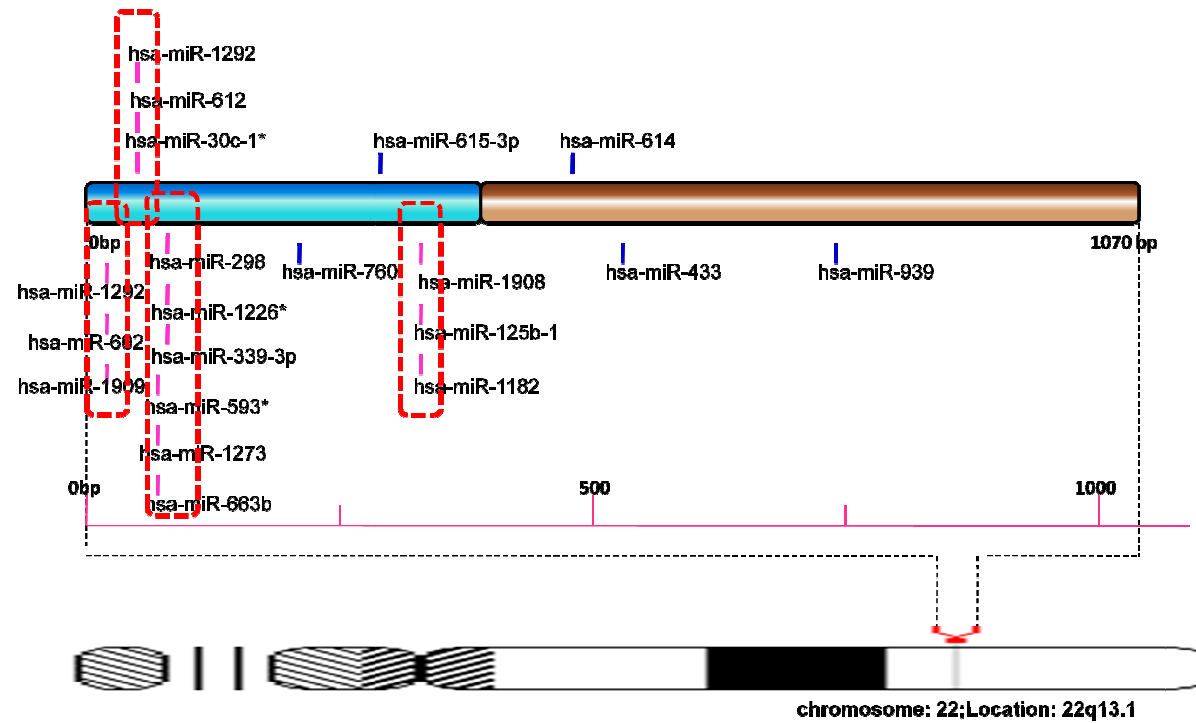

**Fig SF8- Schematic representation of miRNA targets on LOC100128525**

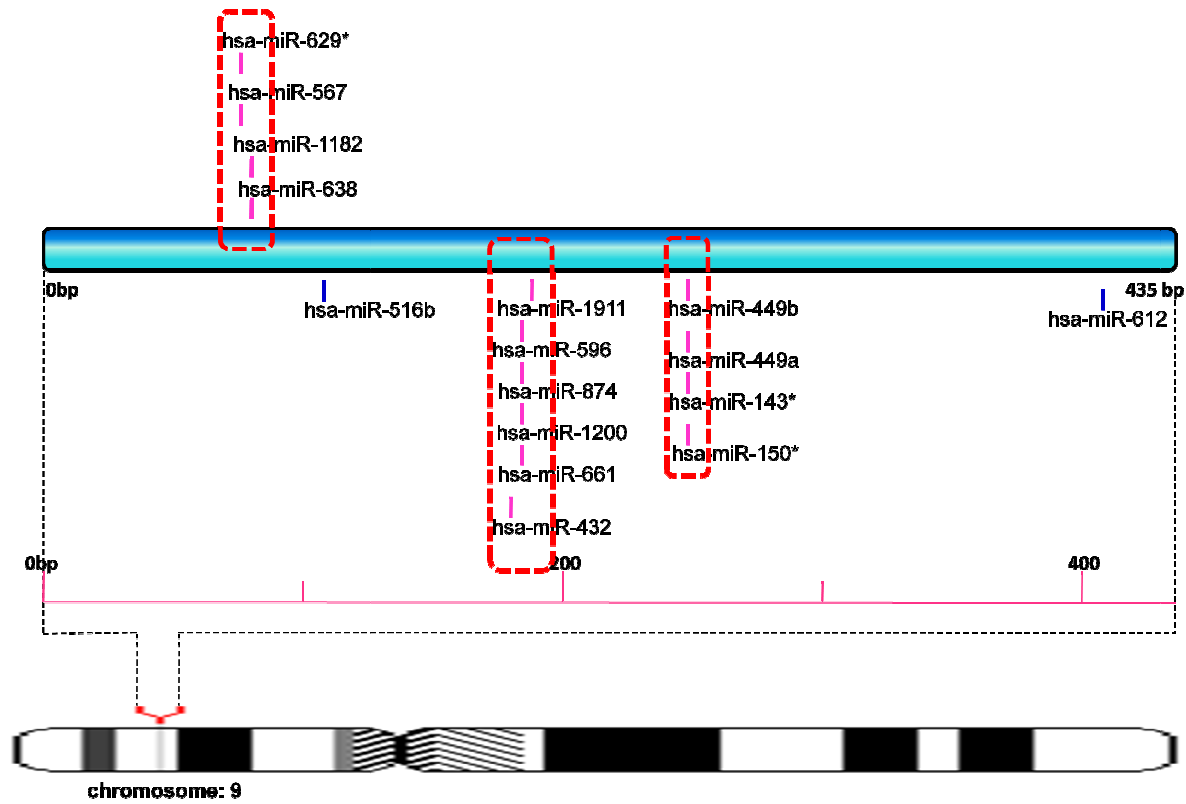

**Fig SF9- Schematic representation of miRNA targets on LOC100133737**

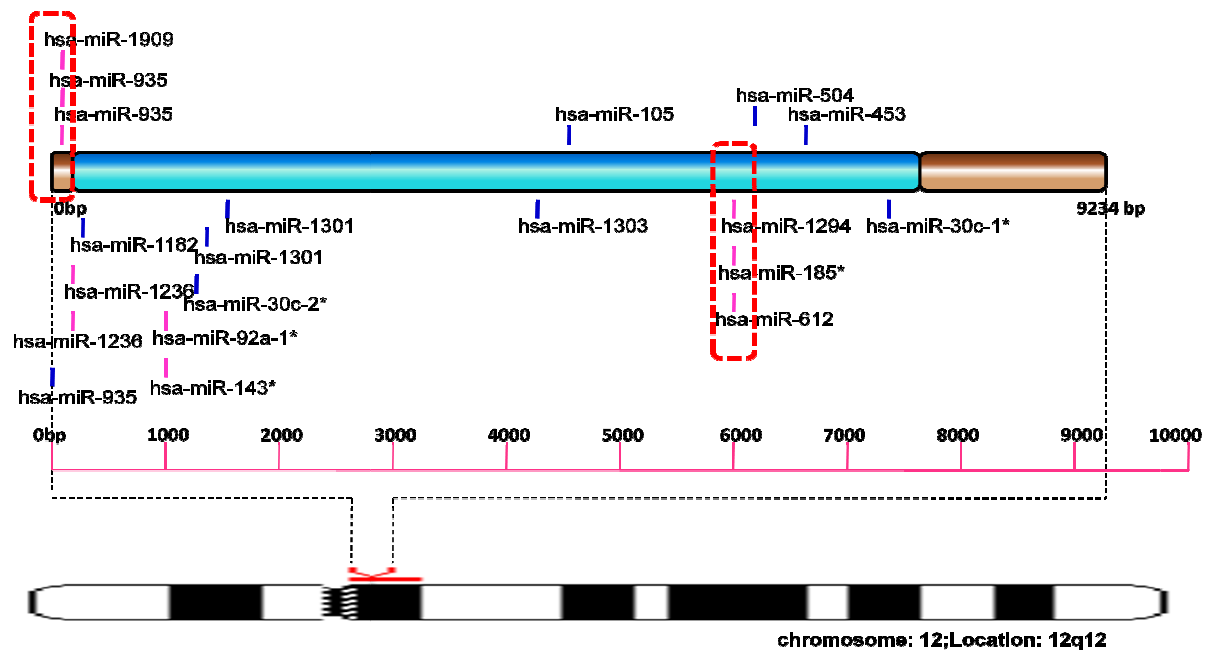

**Fig SF10 - Schematic representation of miRNA targets on 10-LRRK2**

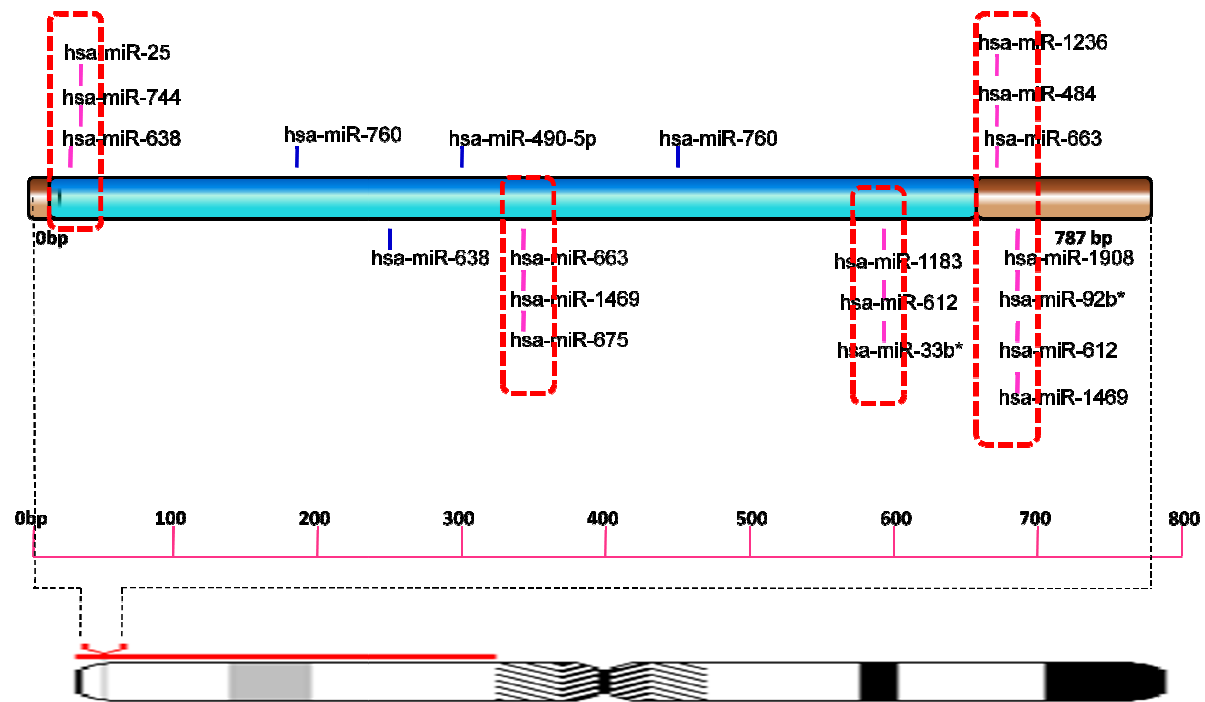

chromosome: 19;Location: 19p13.3

**Fig SF11 - Schematic representation of miRNA targets on NDUFS7**

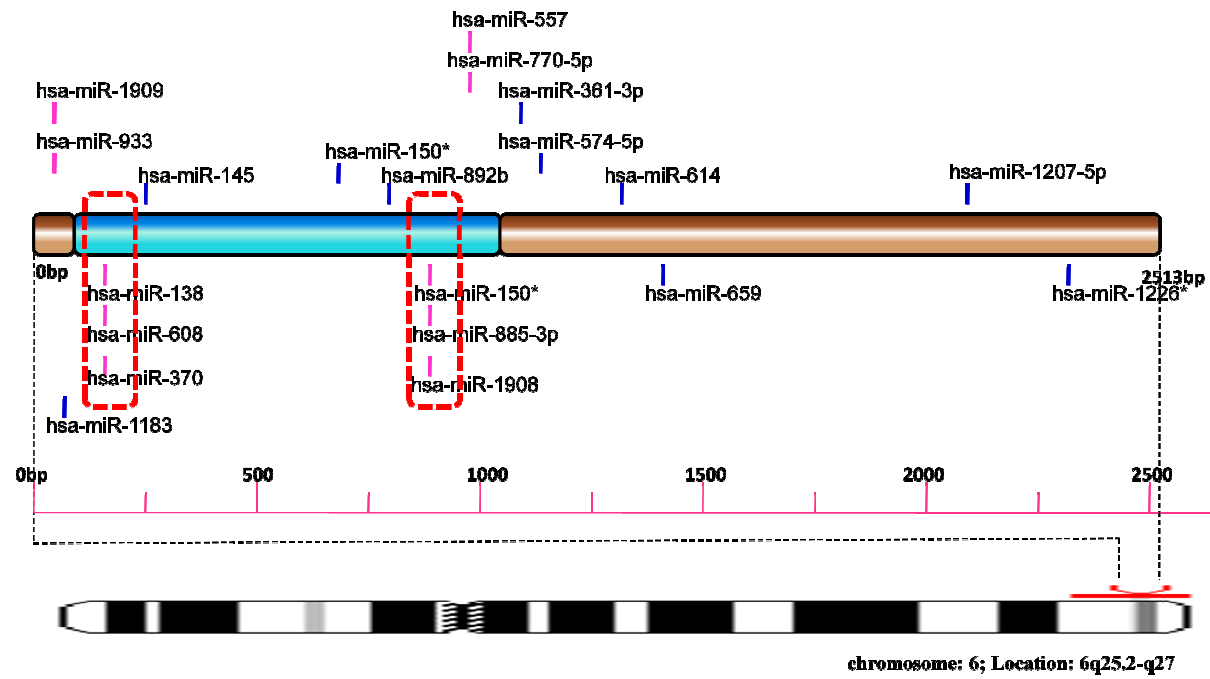

**Fig SF12- Schematic representation of miRNA targets on PARK2**



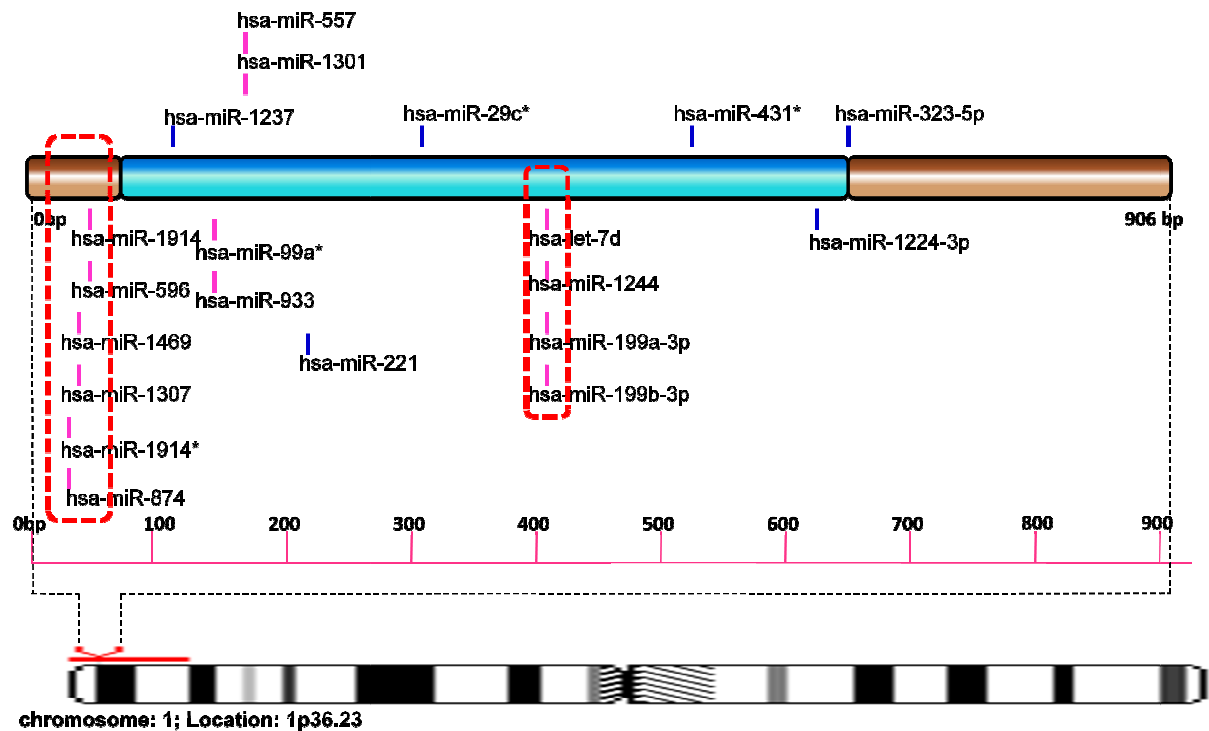

**Fig SF13 - Schematic representation of miRNA targets on PARK7**

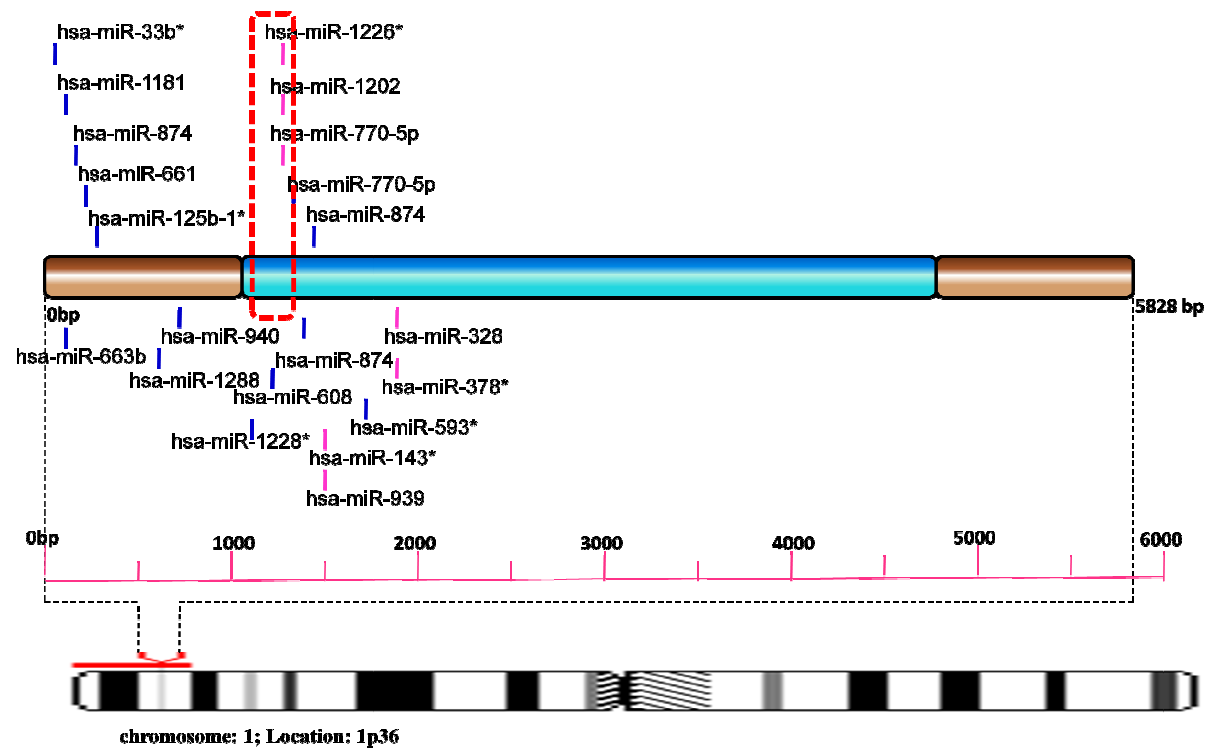

**Fig SF14 - Schematic representation of miRNA targets on PINK1**

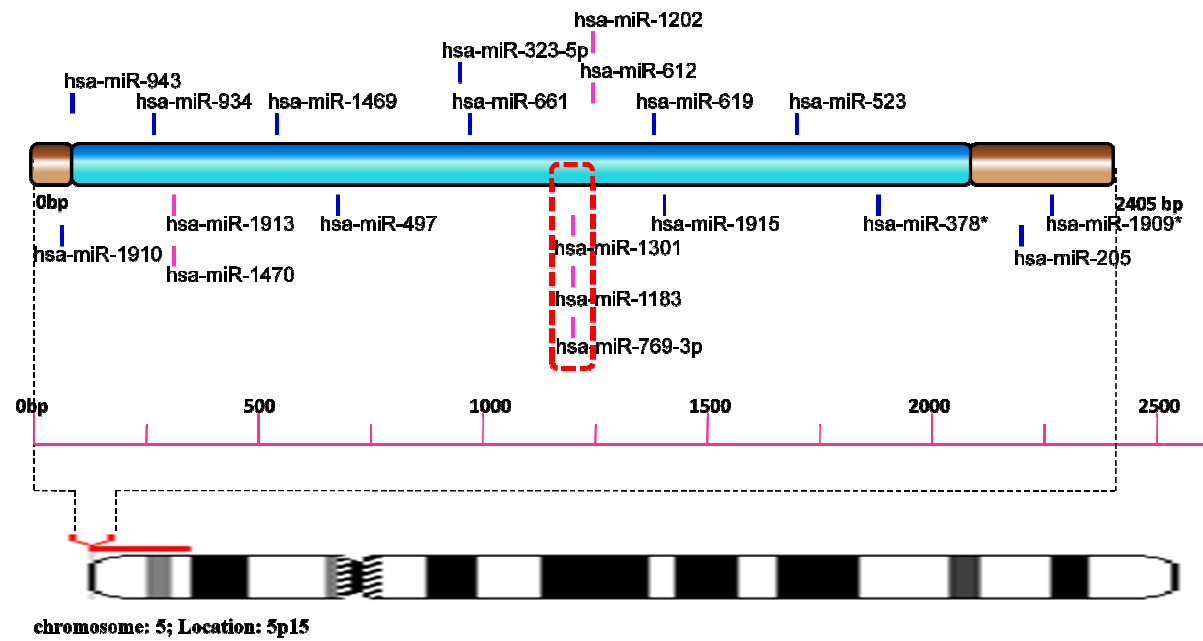

**Fig SF15- Schematic representation of miRNA targets on SDHA**

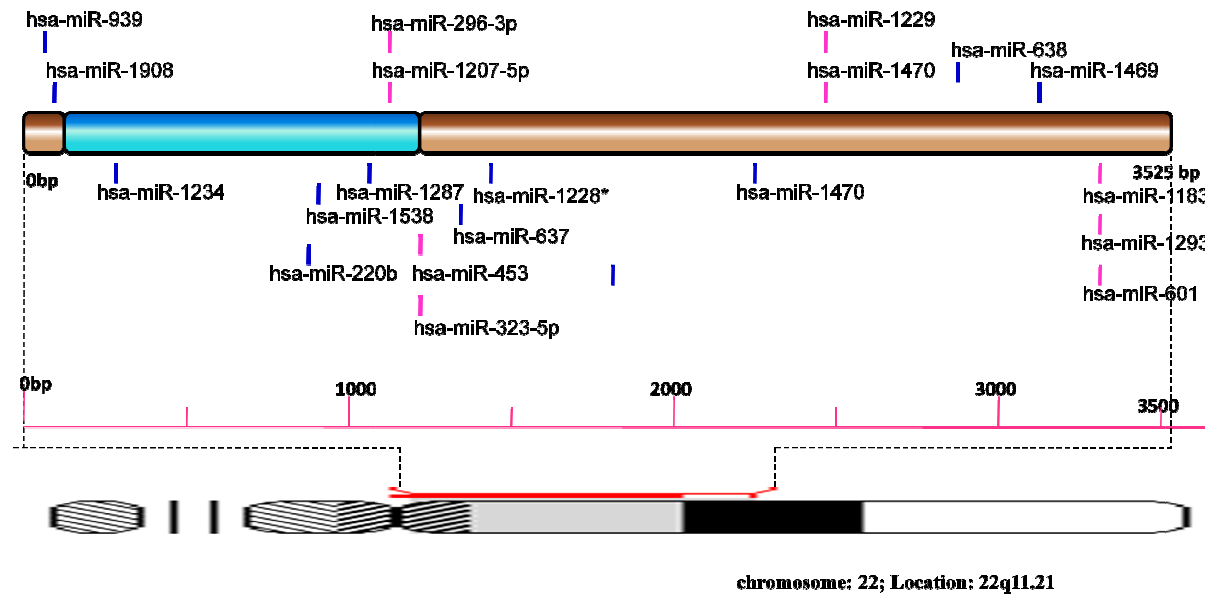

**Fig SF16 - Schematic representation of miRNA targets on SEPT5**

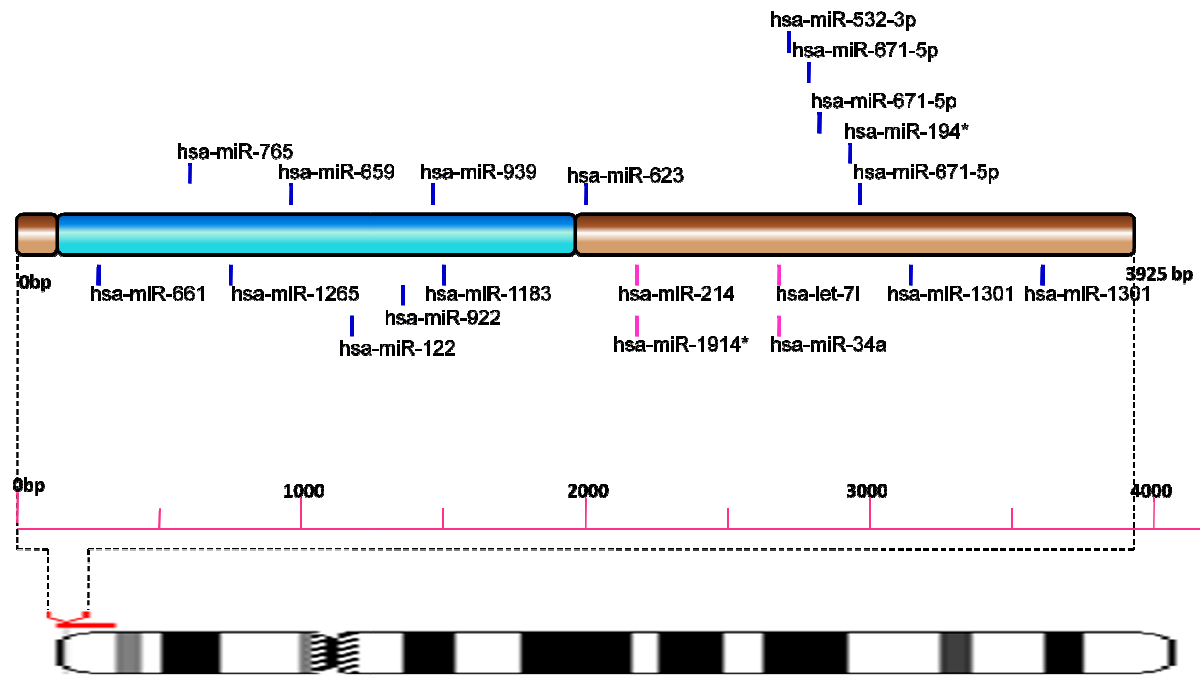

chromosome: 5; Location: 5p15.3

**Fig SF17 - Schematic representation of miRNA targets on SLC6A3**

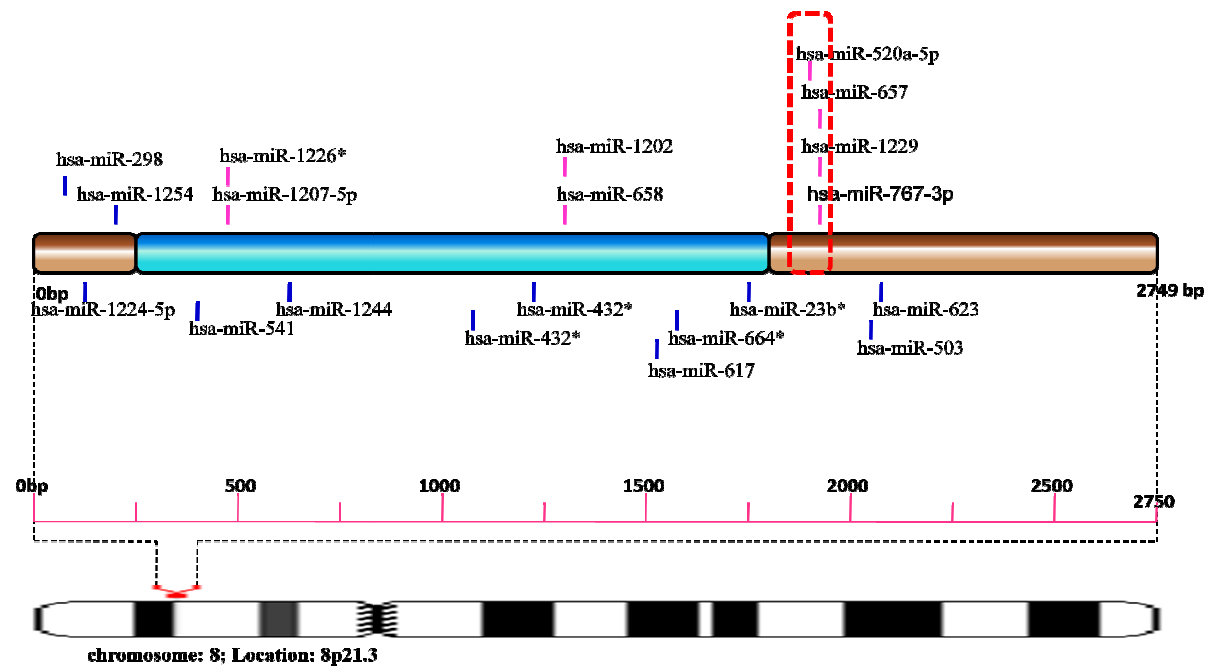

**Fig SF18 - Schematic representation of miRNA targets on SLC18A1**

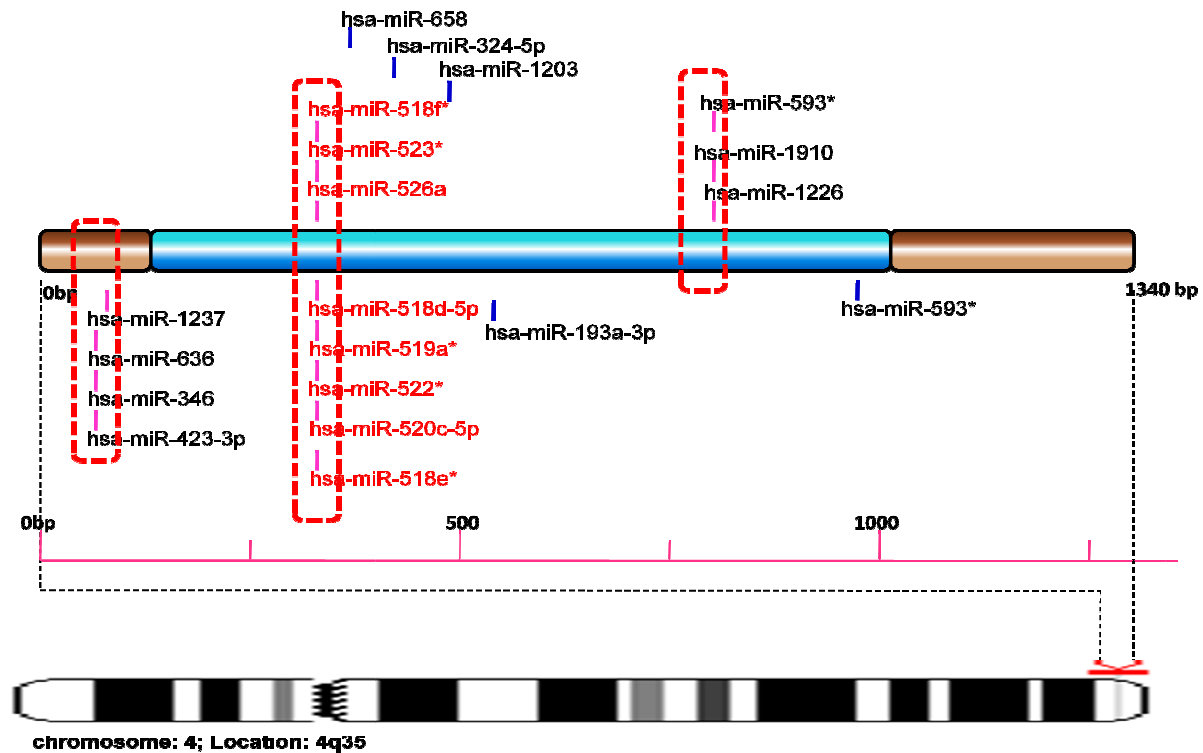

**Fig SF19 - Schematic representation of miRNA targets on SLC25A4**

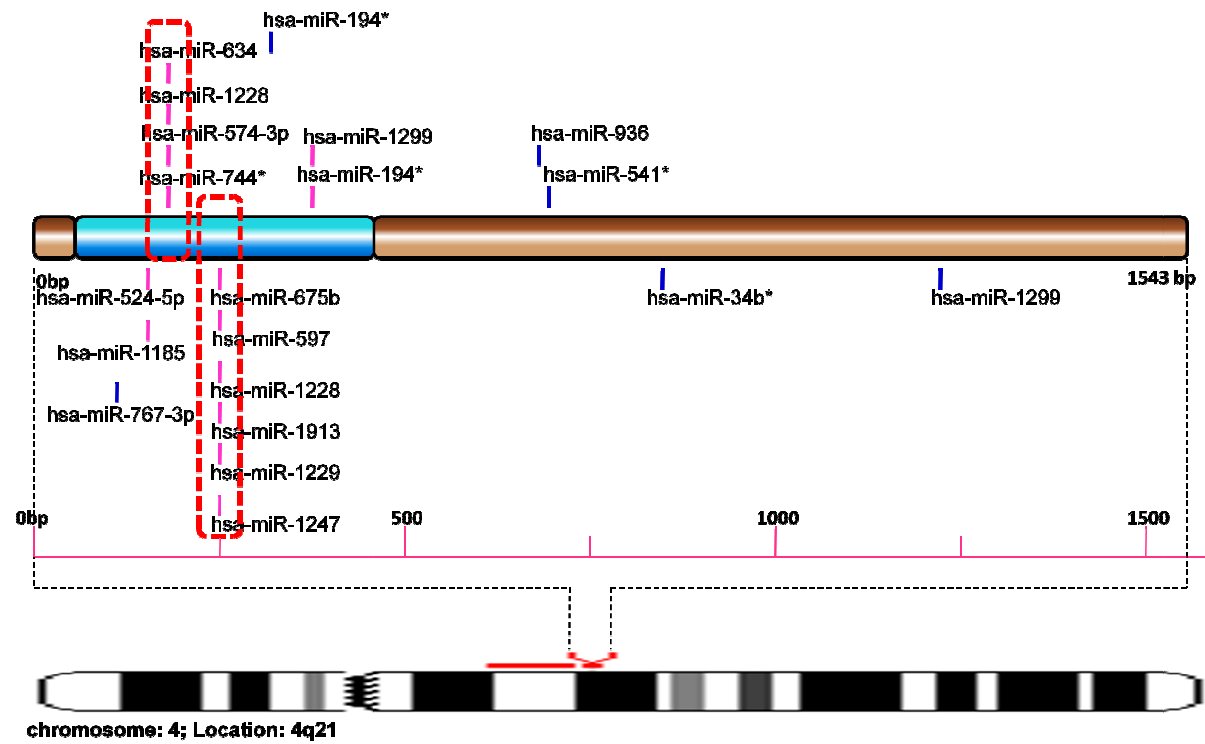

**Fig SF20 - Schematic representation of miRNA targets on SNCA**



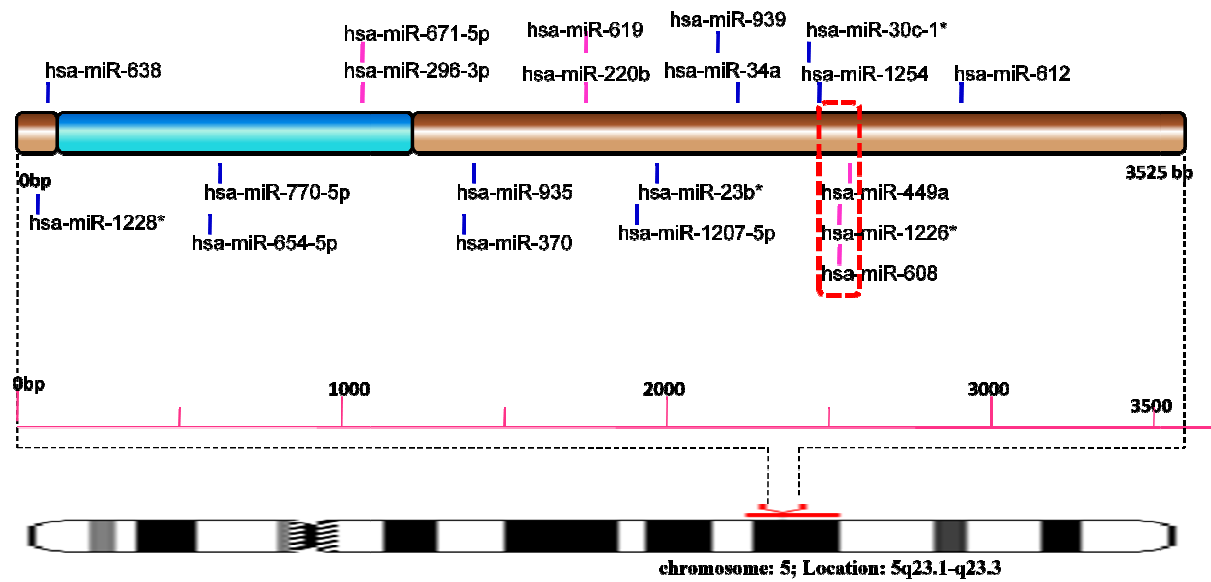

**Fig SF21 - Schematic representation of miRNA targets on SNCAIP**

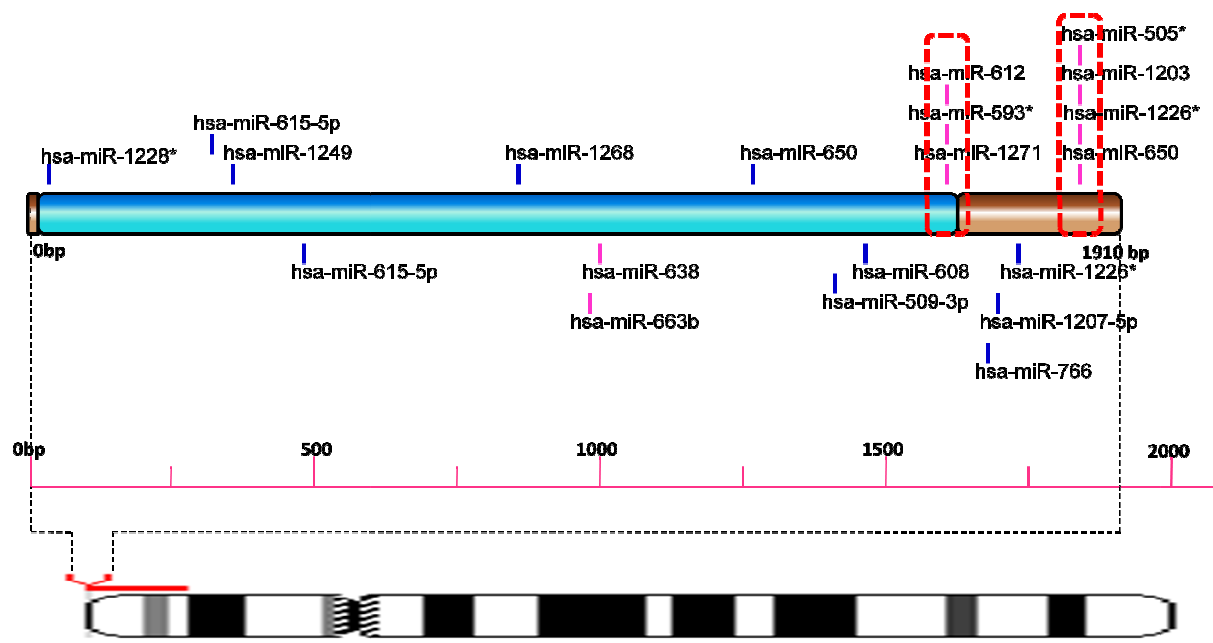

chromosome: 11; Location: 11p15.5

**Fig SF22 - Schematic representation of miRNA targets on TH**

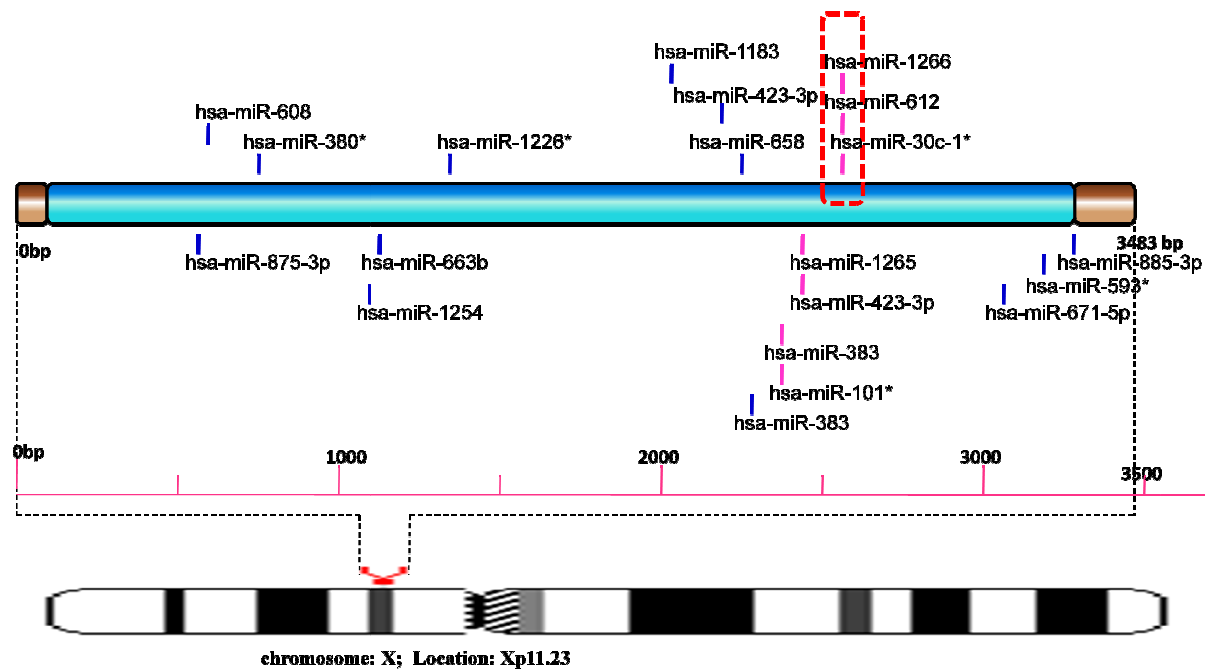

**Fig SF23 - Schematic representation of miRNA targets on UBE1**

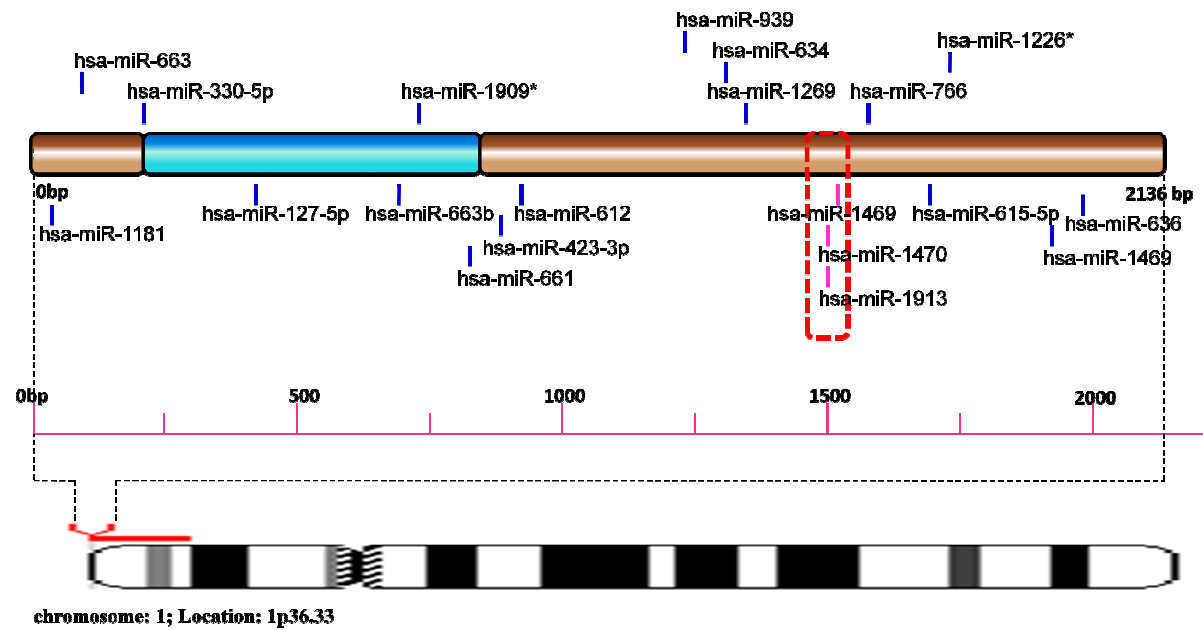

**Fig SF24 - Schematic representation of miRNA targets on UBE2J2**

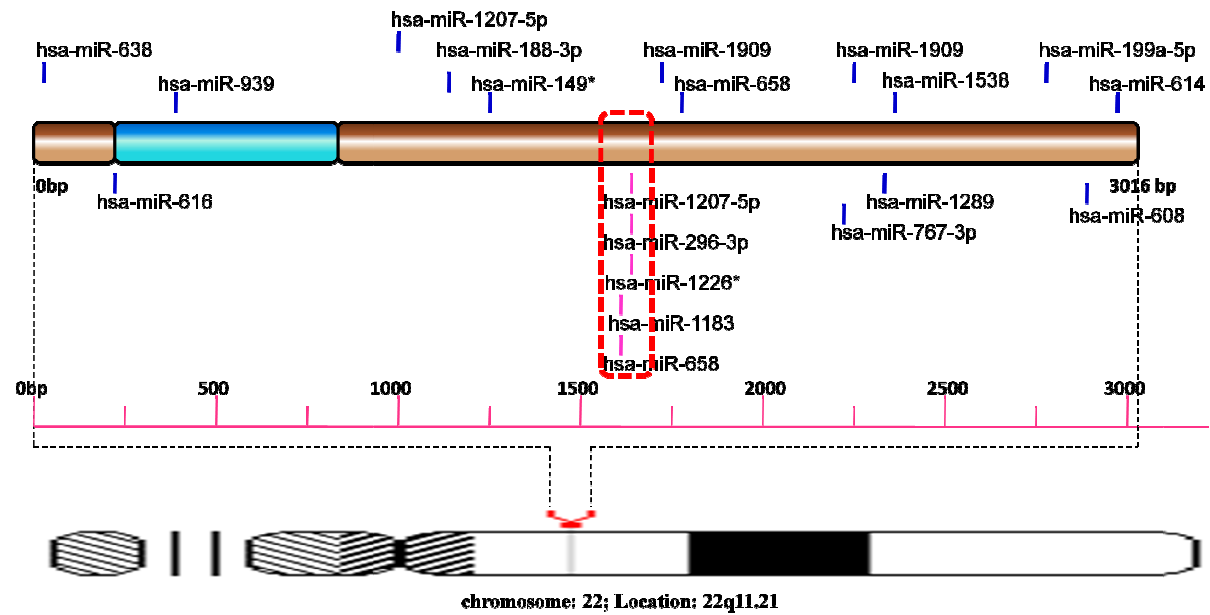

**Fig SF25 - Schematic representation of miRNA targets on UBE2L3**

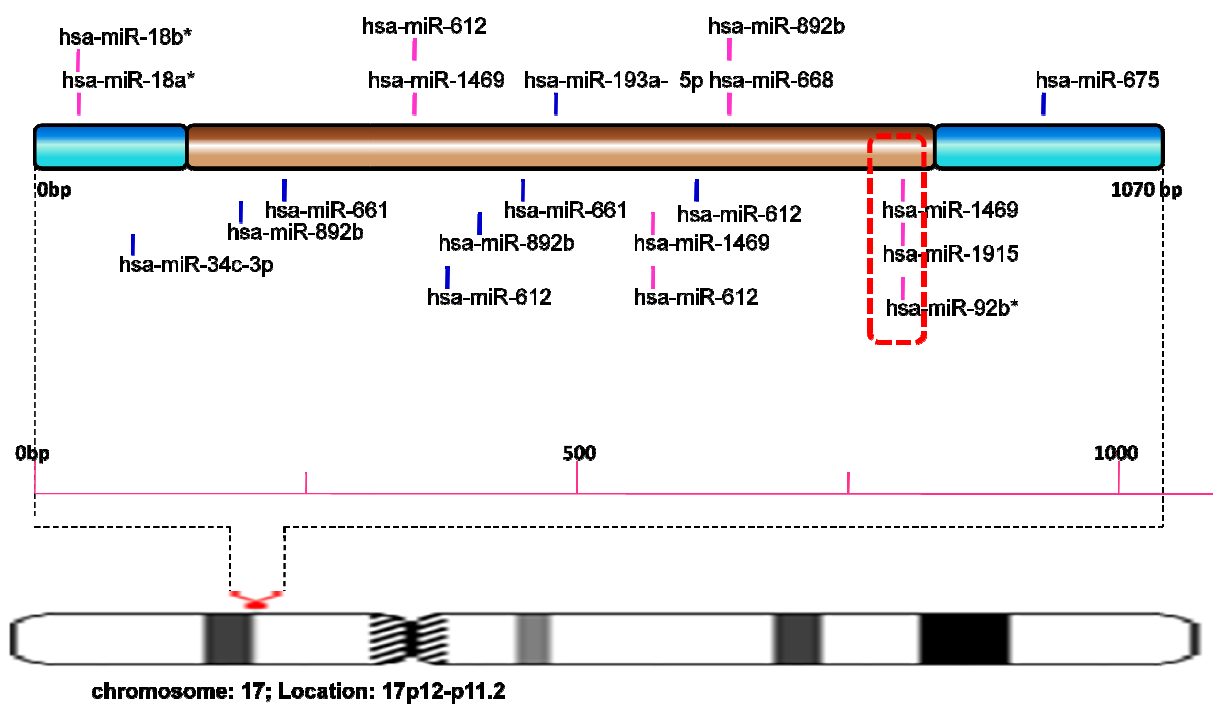

**Fig SF26 - Schematic representation of miRNA targets on ubiquitinB**

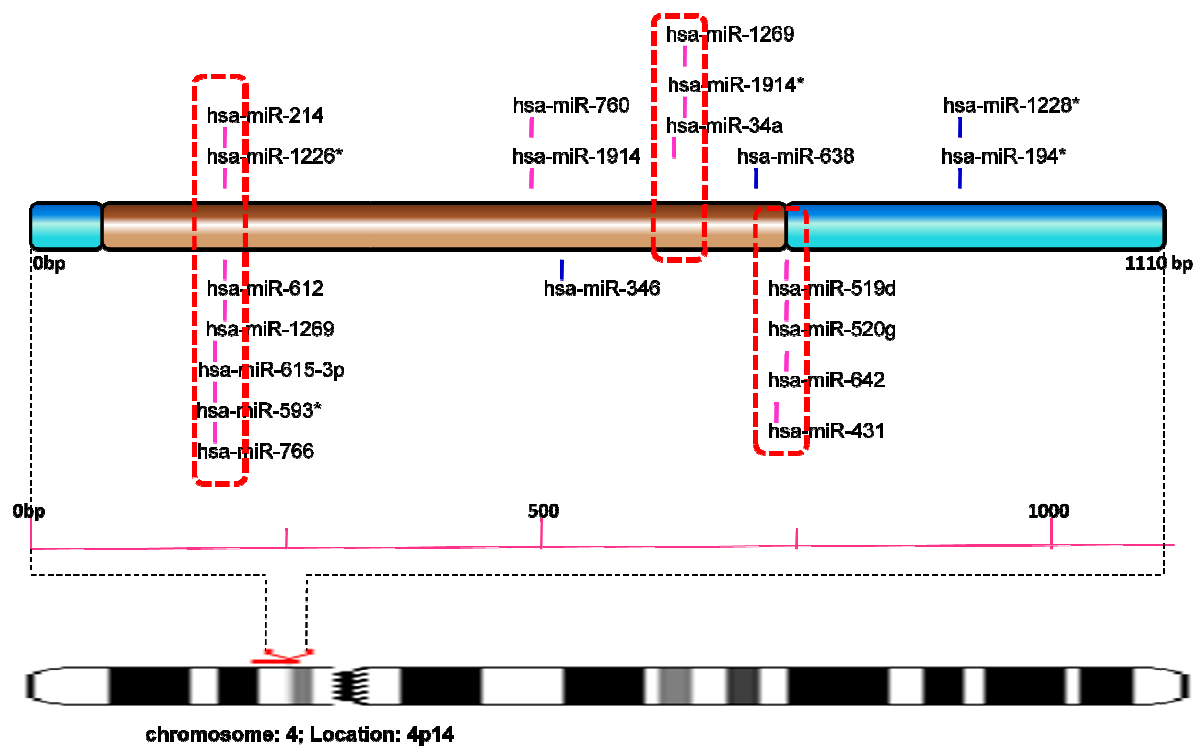

**Fig SF27 - Schematic representation of miRNA targets on UCHL1**

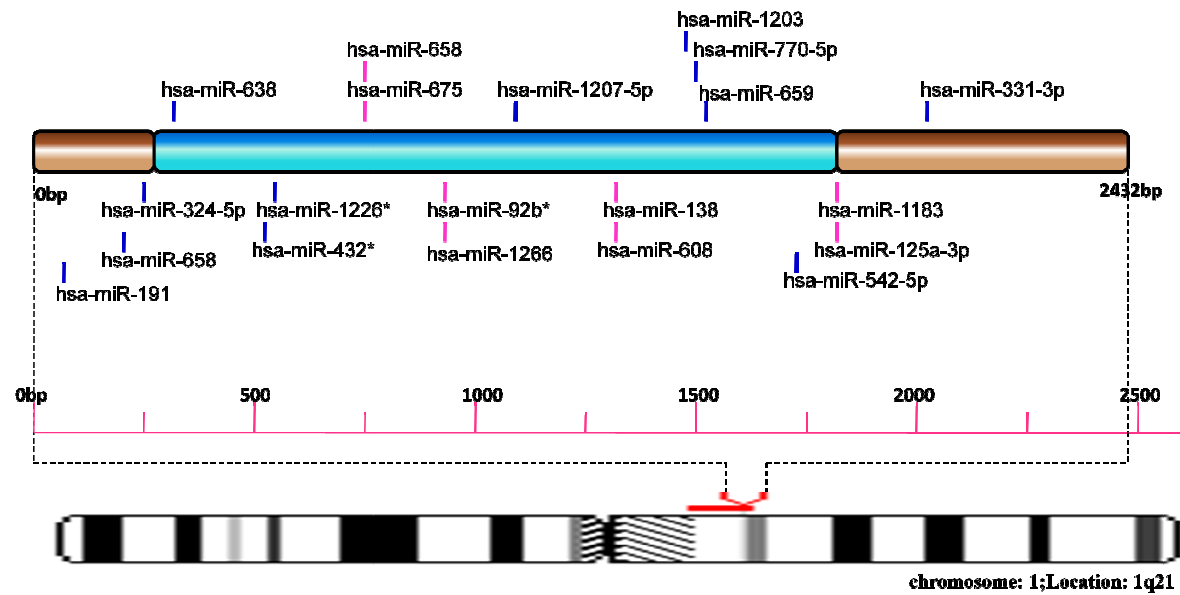

**Fig SF28 - Schematic representation of miRNA targets on GBA**



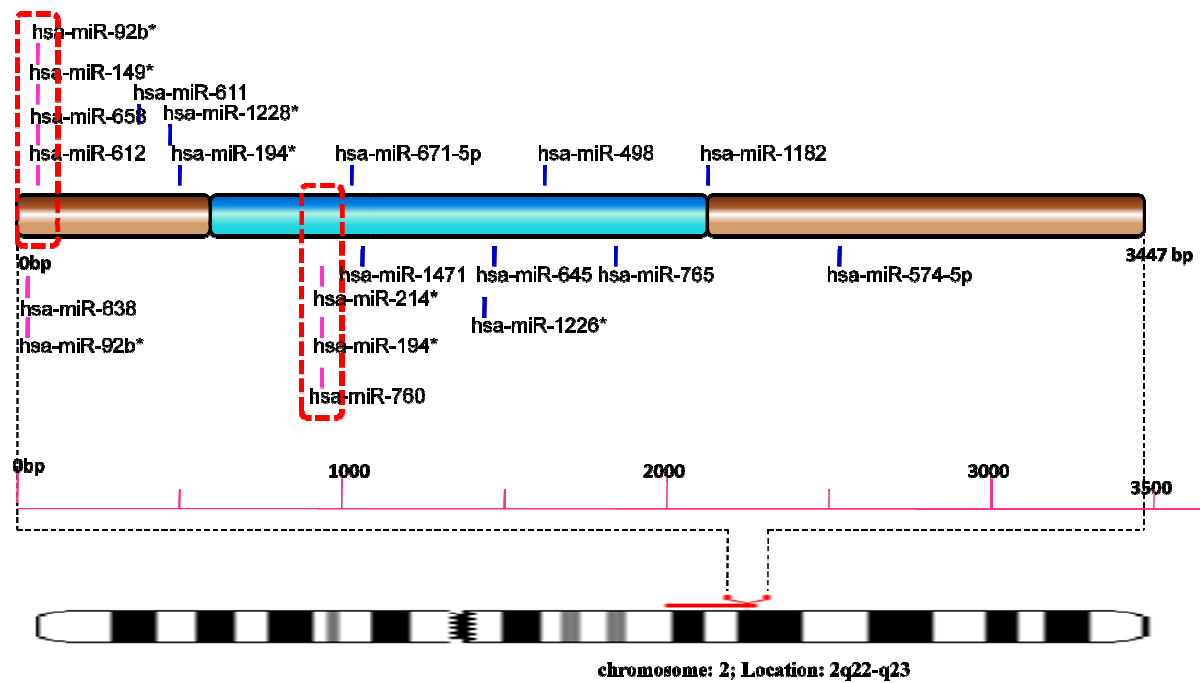

**Fig SF29 - Schematic representation of miRNA targets on NR4A2**

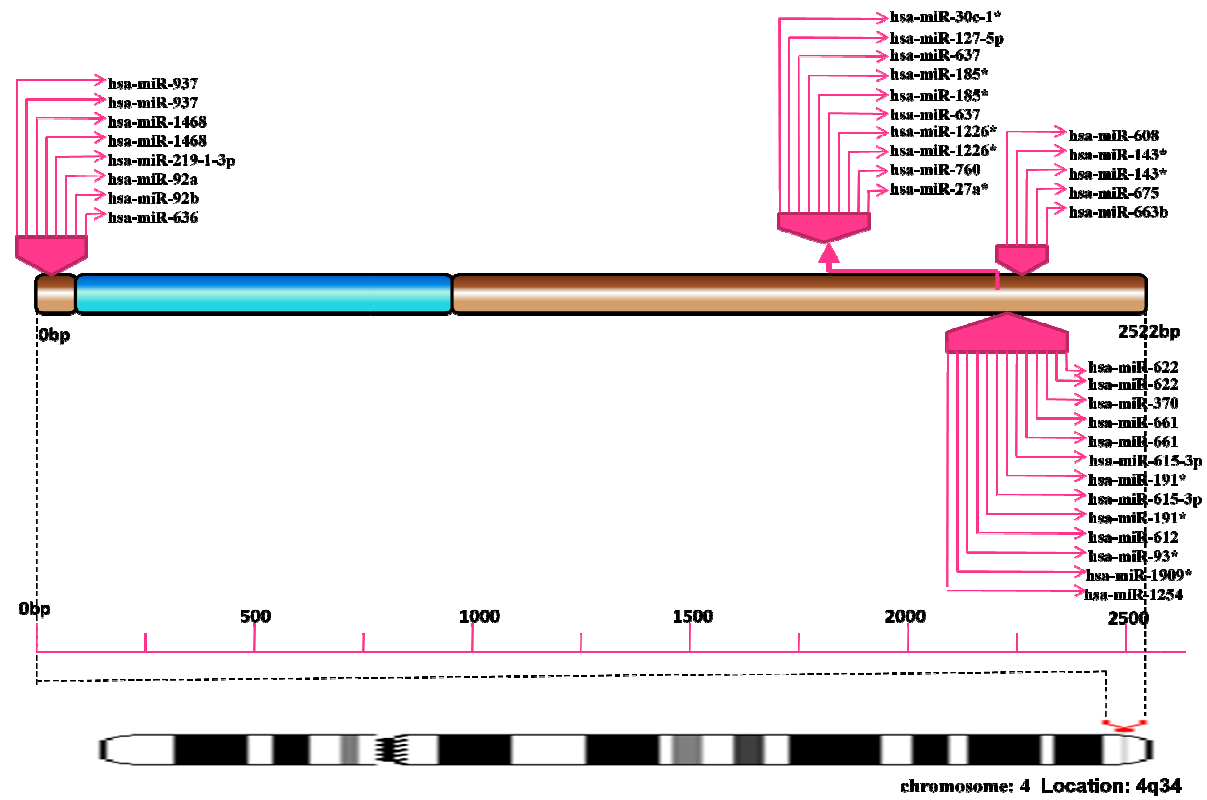

**Fig SF30- Schematic representation of miRNA target site hotspots on CASP3**

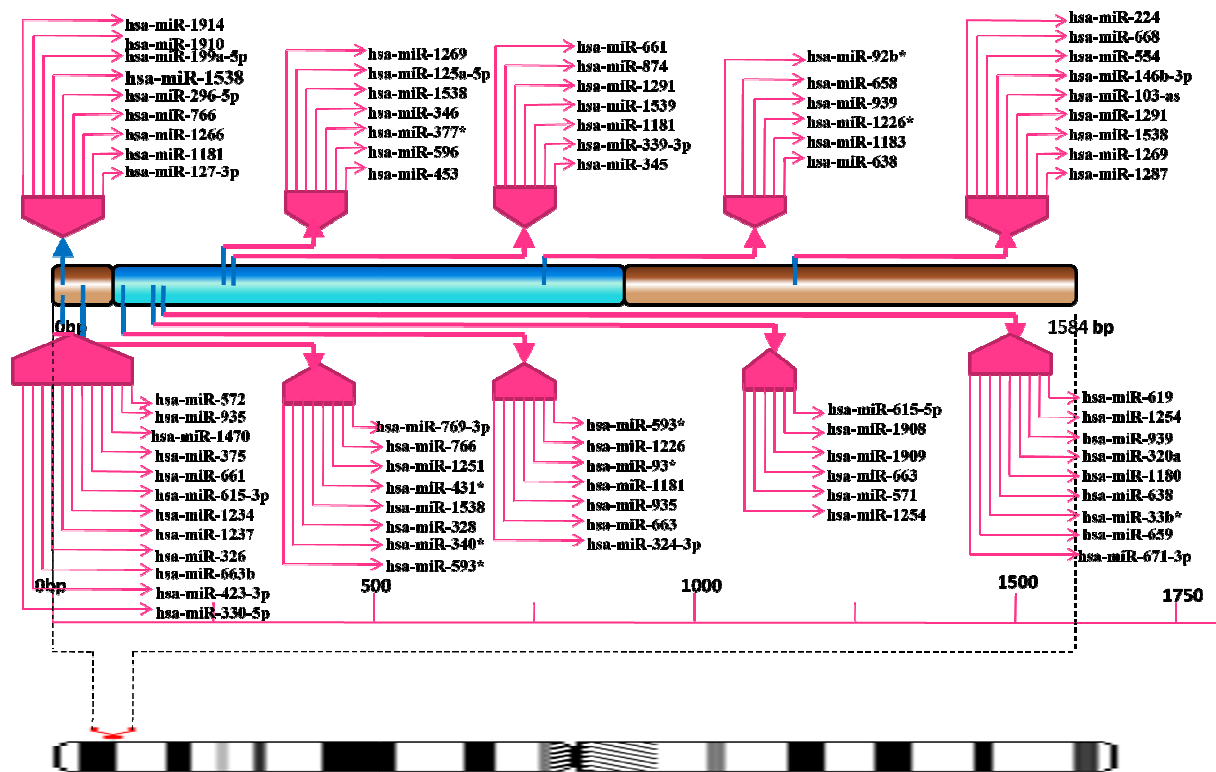

chromosome: 1; Location: 1p36.3-p36.1

**Fig SF31- Schematic representation of miRNA target site hotspots on ASP9**

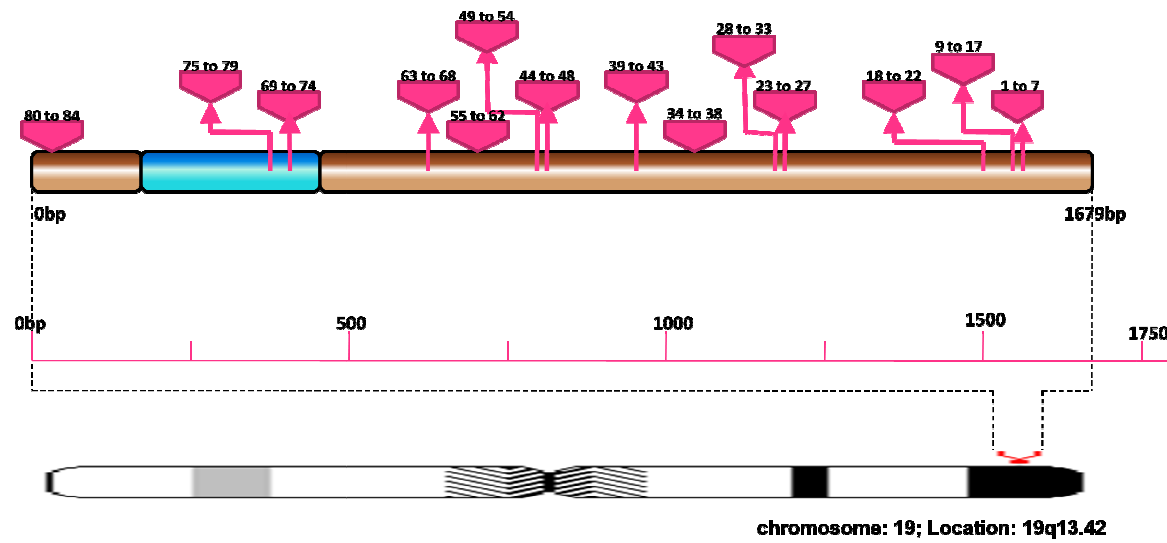

**Fig SF32 - Schematic representation of miRNA target site hotspots on COX6B2**

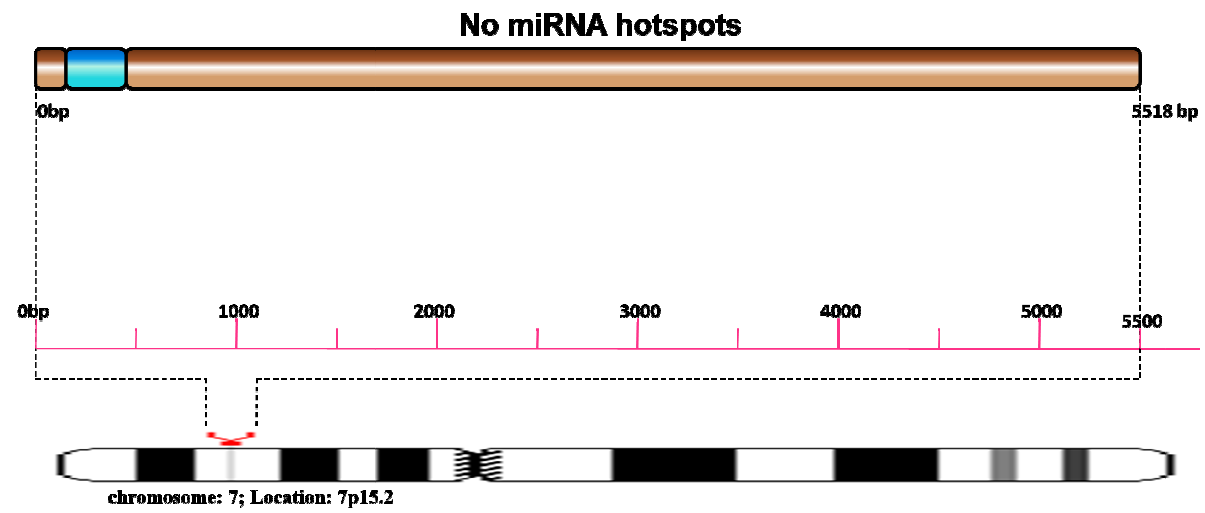

**Fig SF33- Schematic representation of miRNA target site hotspots on CYCS**

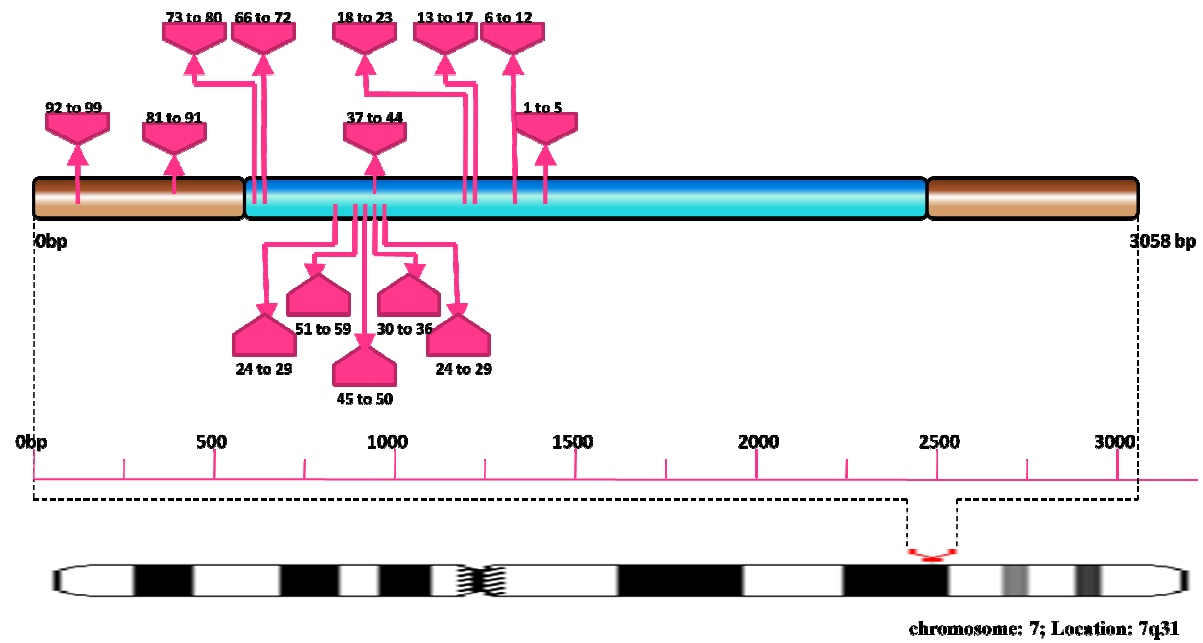

**Fig SF34- Schematic representation of miRNA target site hotspots on GPR37**

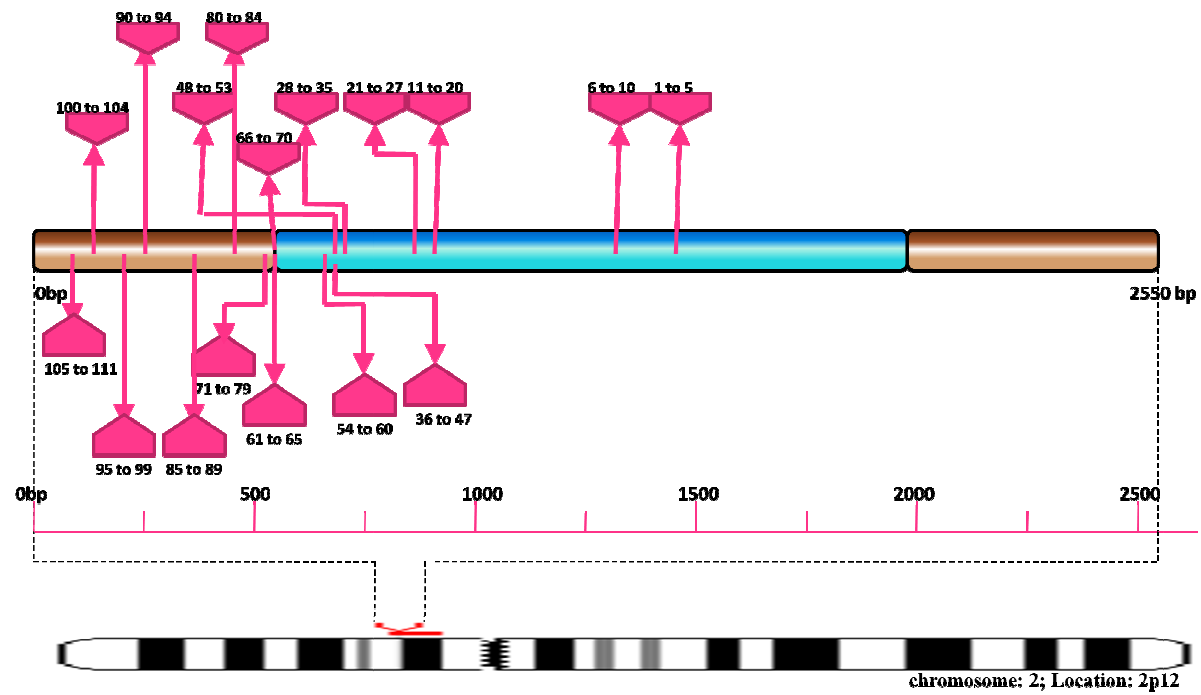

**Fig SF35- Schematic representation of miRNA target site hotspots on HTRA2**

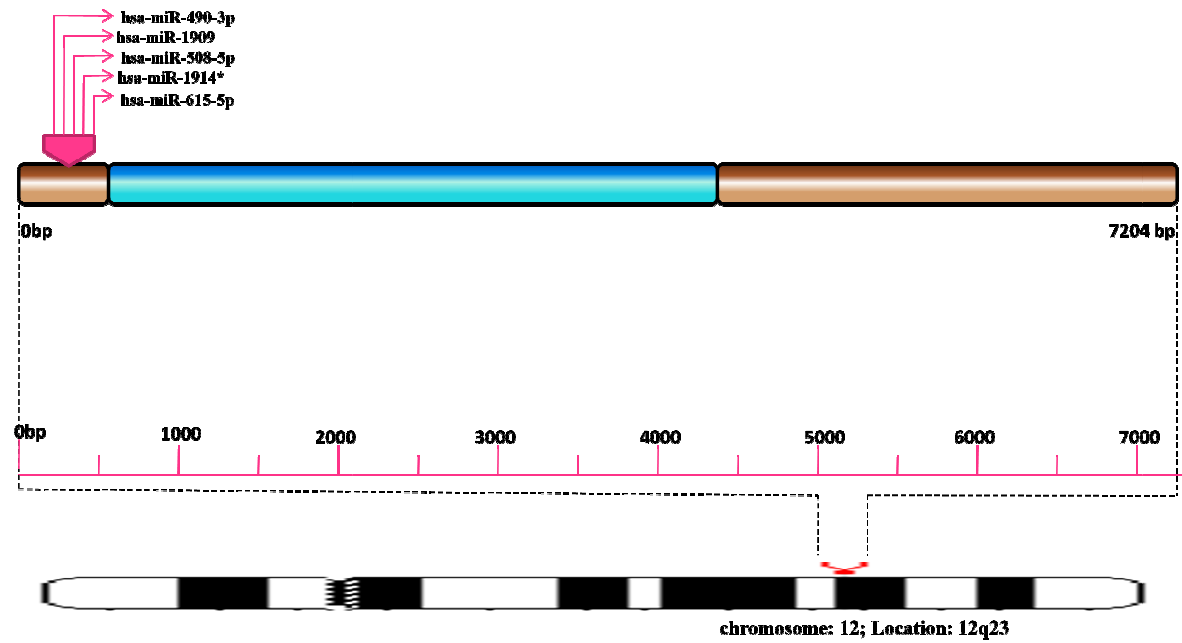

**Fig SF36- Schematic representation of miRNA target site hotspots on APAF1**



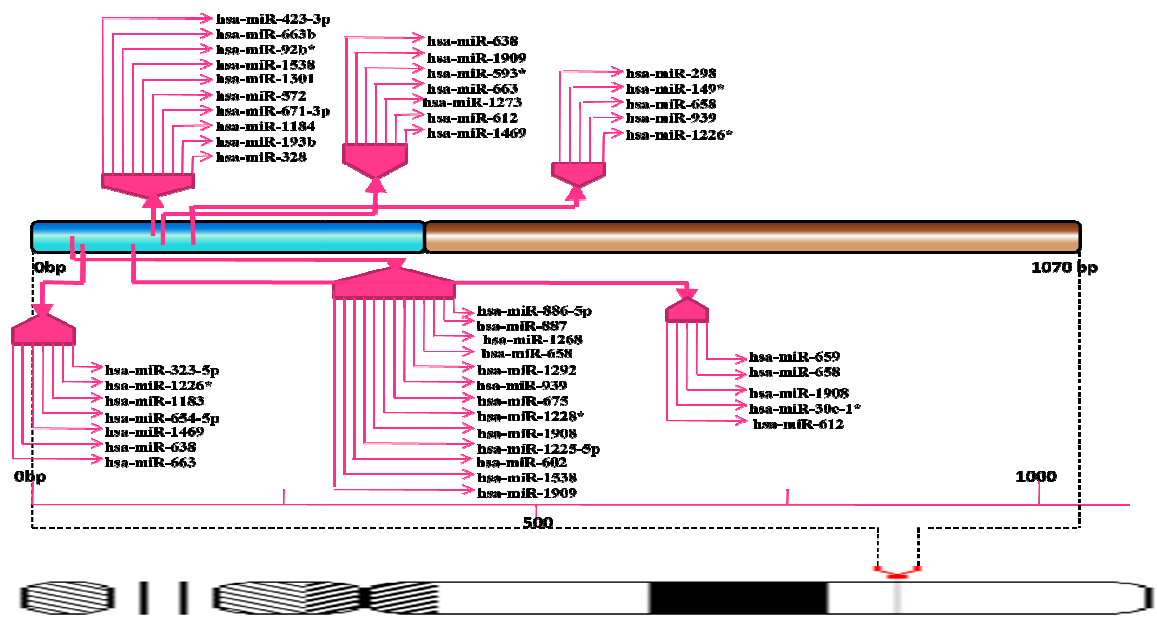

chromosome: 22;Location: 22q13.1

**Fig SF37- Schematic representation of miRNA target site hotspots on LOC100128525**

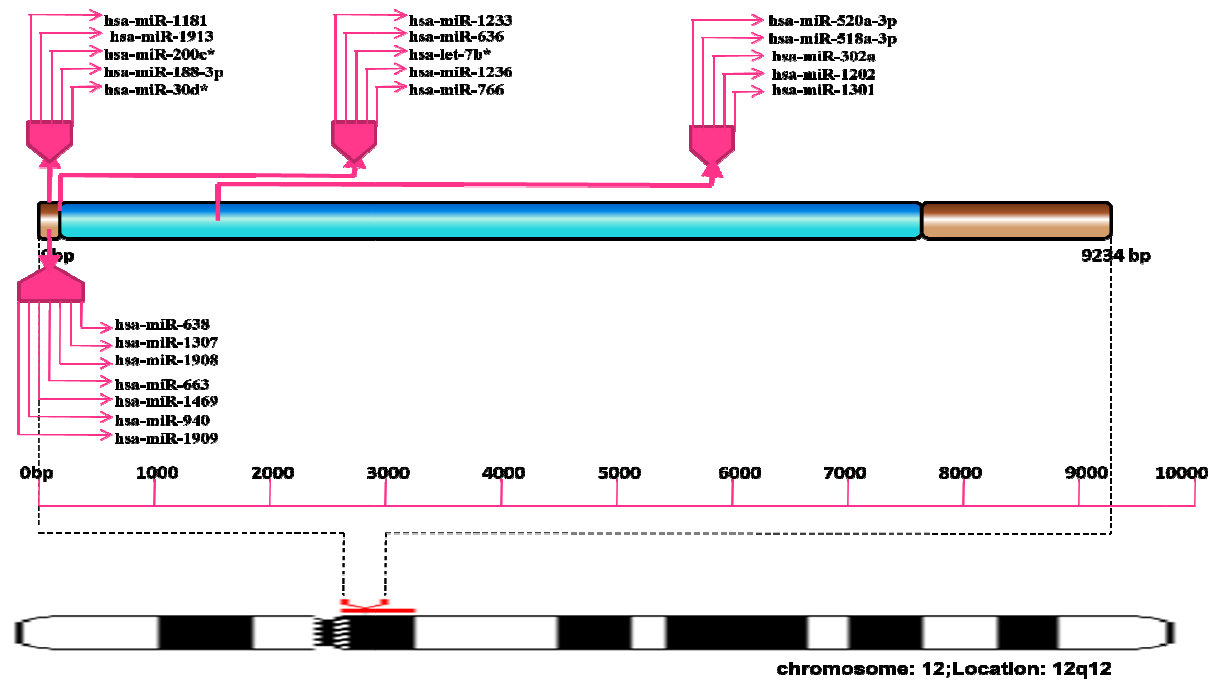

**Fig SF38 - Schematic representation of miRNA target site hotspots on 10-LRRK2**

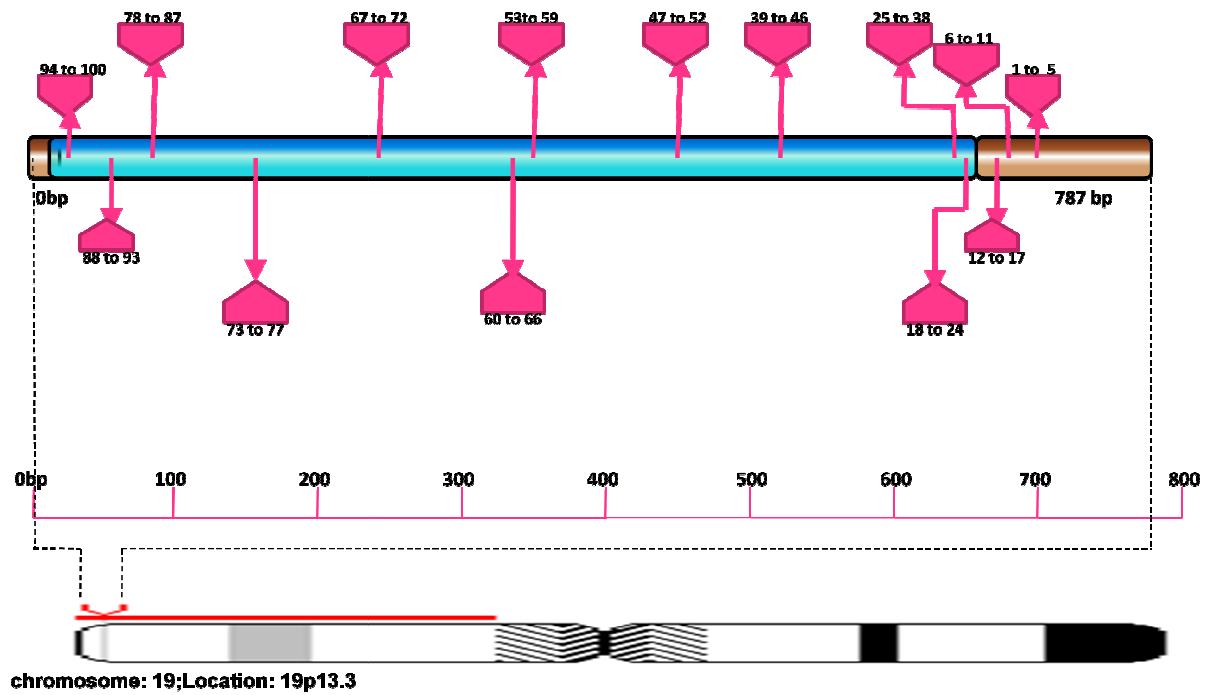

**Fig SF39 - Schematic representation of miRNA target site hotspots on NDUFS7**

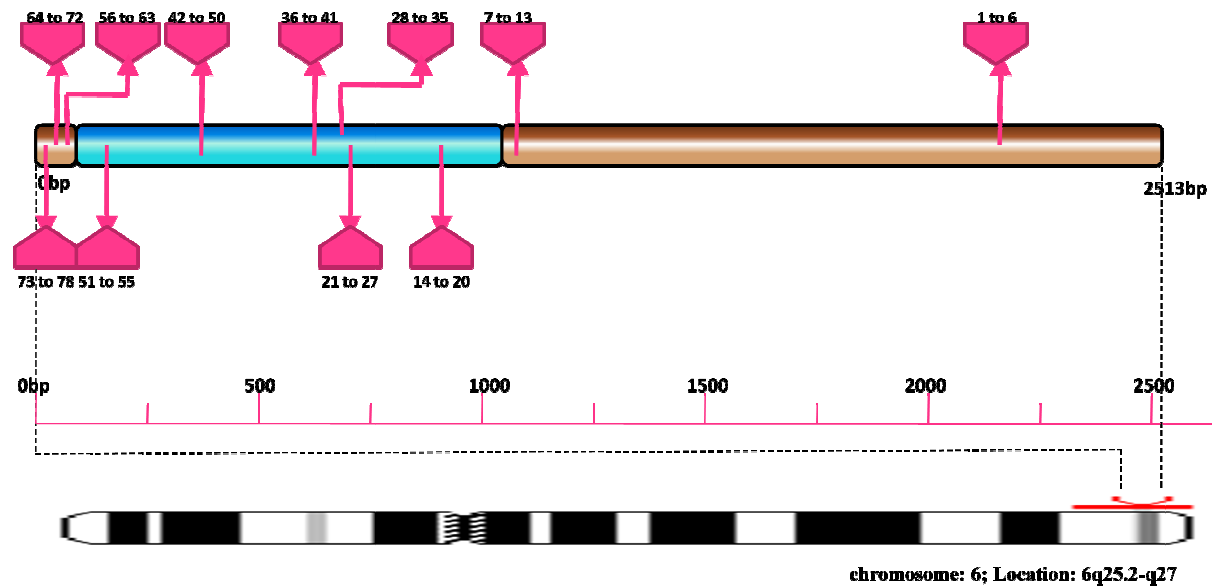

**Fig SF40- Schematic representation of miRNA target site hotspots on PARK2**

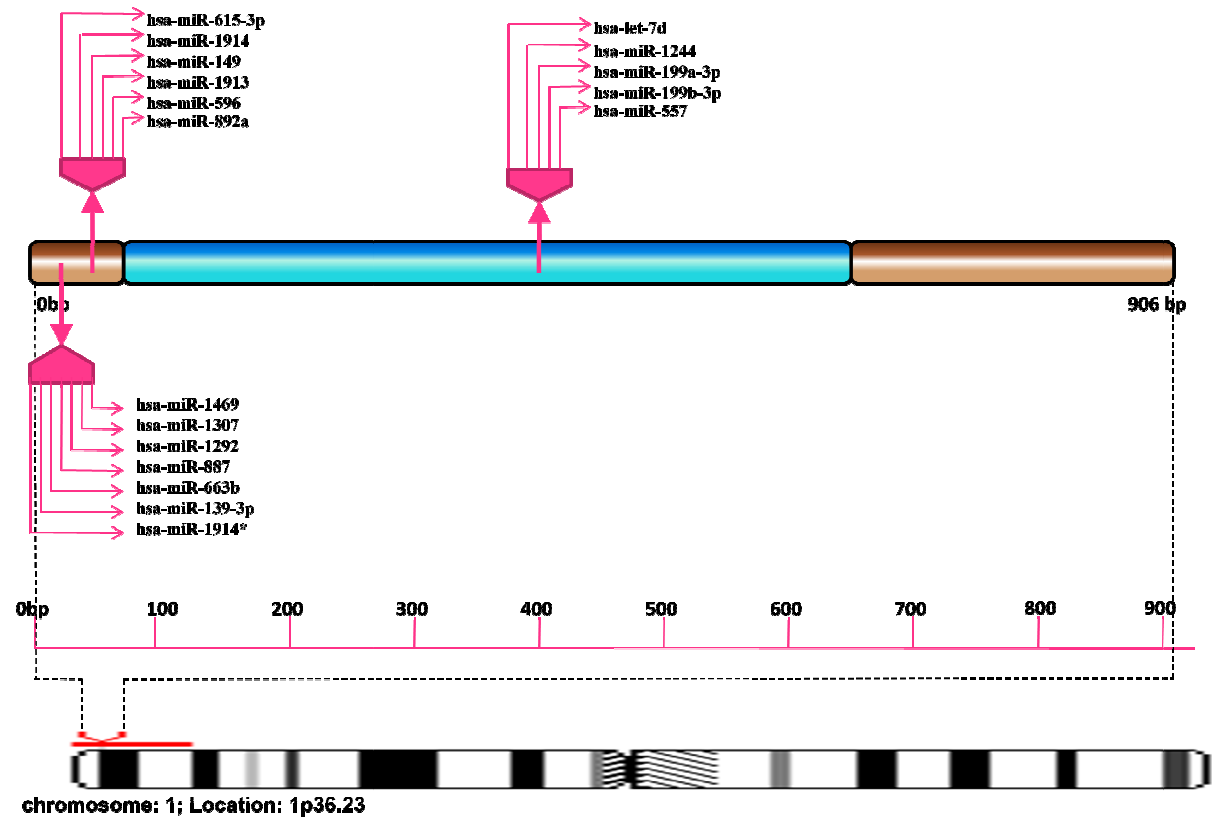

**Fig SF41 - Schematic representation of miRNA target site hotspots on PARK7**

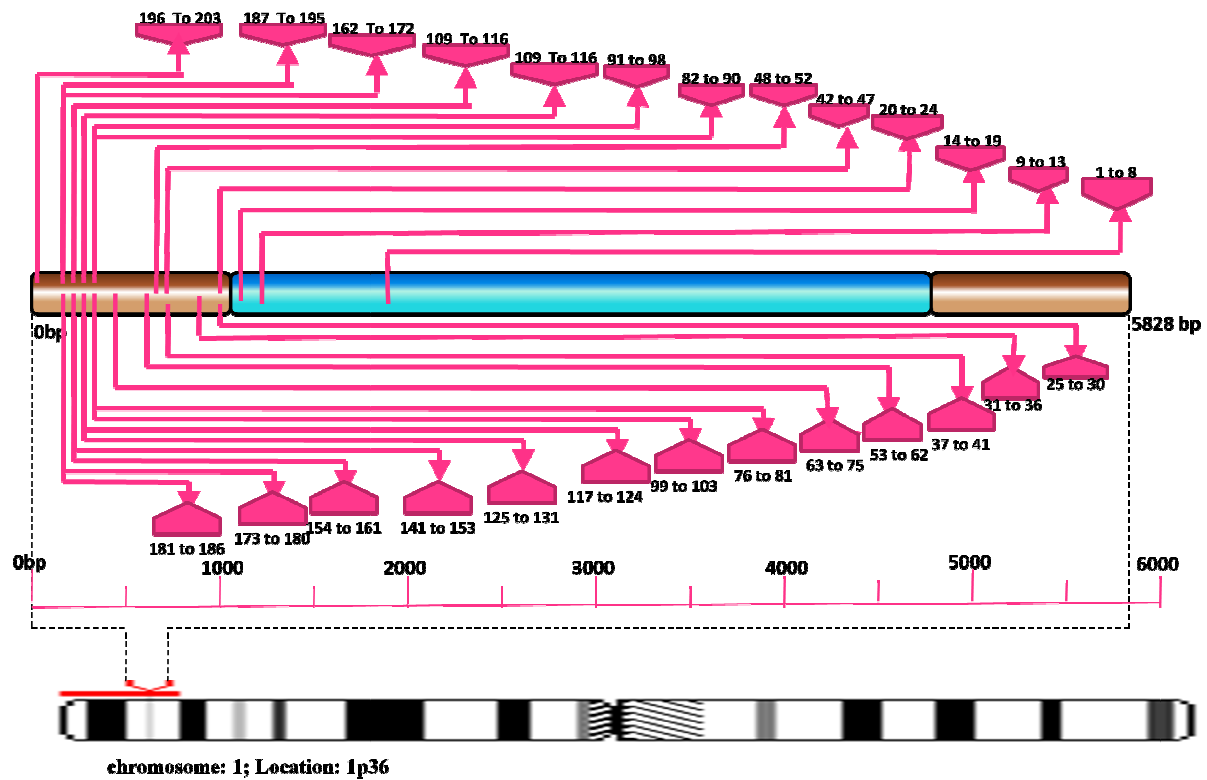

**Fig SF 42 - Schematic representation of miRNA target site hotspots on PINK1**

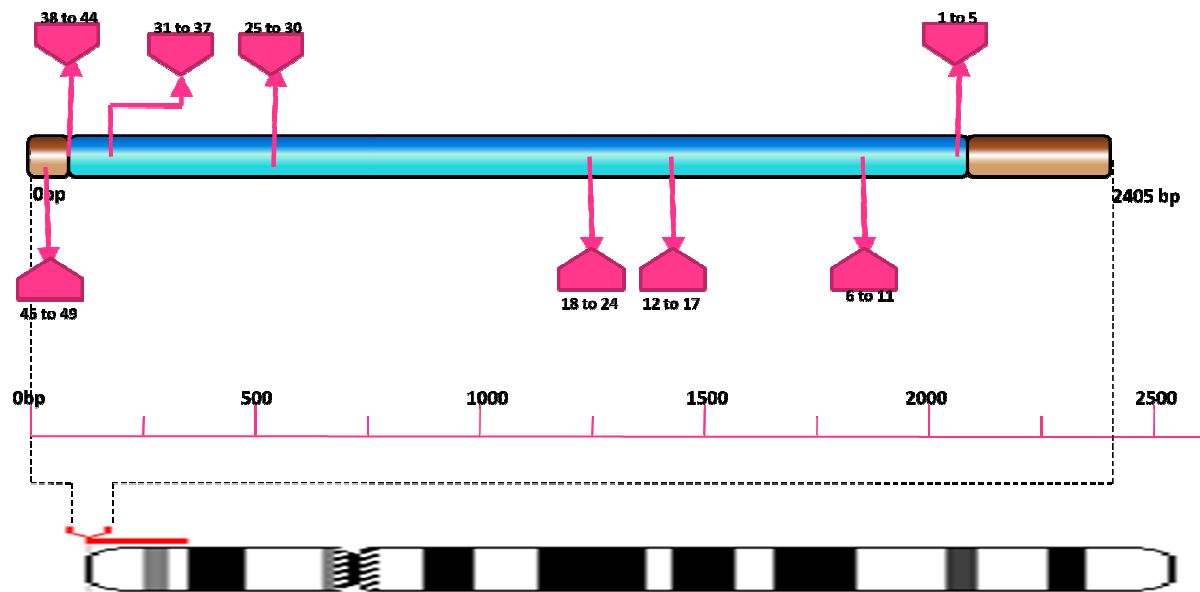

chromosome: 5; Location: 5p15

**Fig SF 43- Schematic representation of miRNA target site hotspots on SDHA**

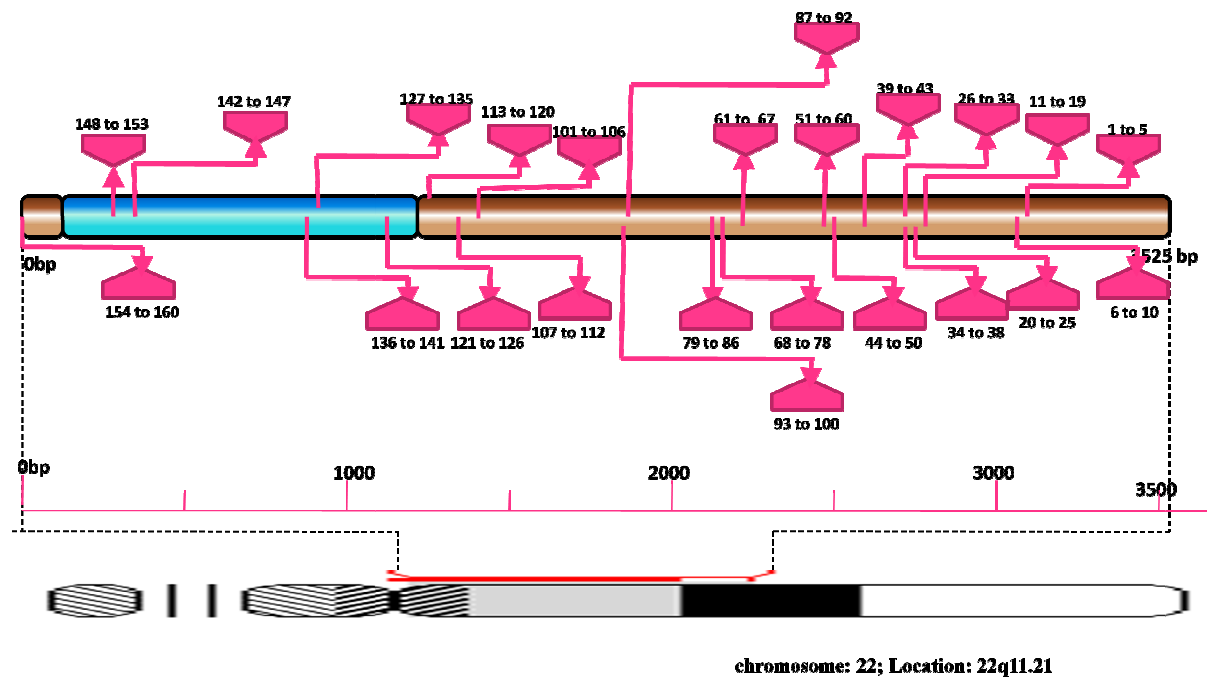

**Fig SF 44 - Schematic representation of miRNA target site hotspots on SEPT5**



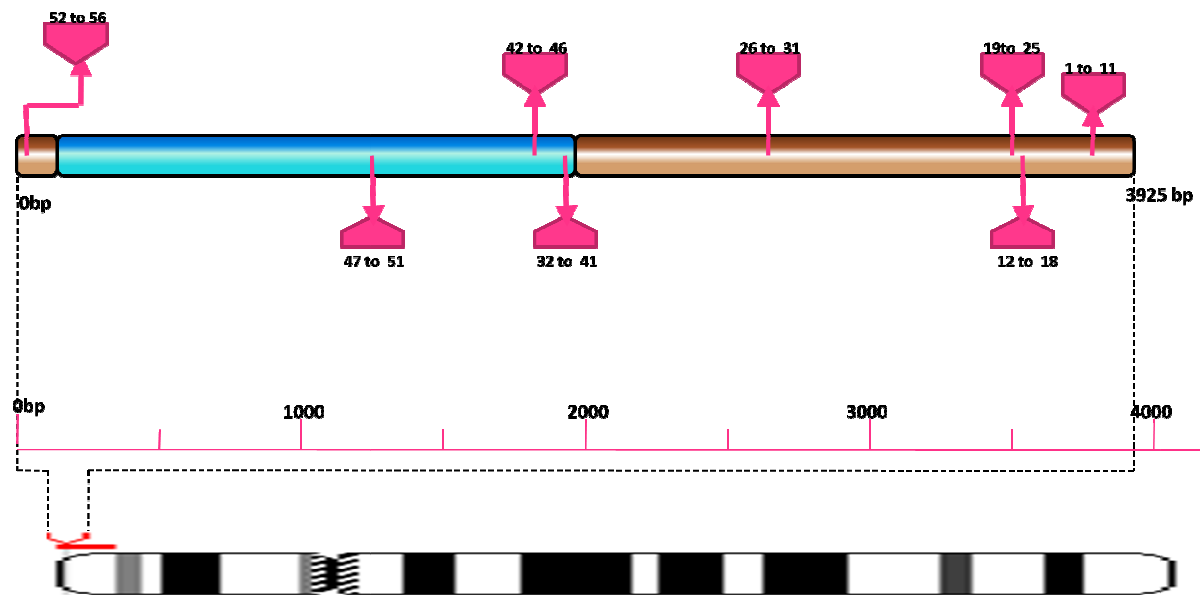

chromosome: 5; Location: 5p15.3

**Fig SF 45 - Schematic representation of miRNA target site hotspots on SLC6A3**

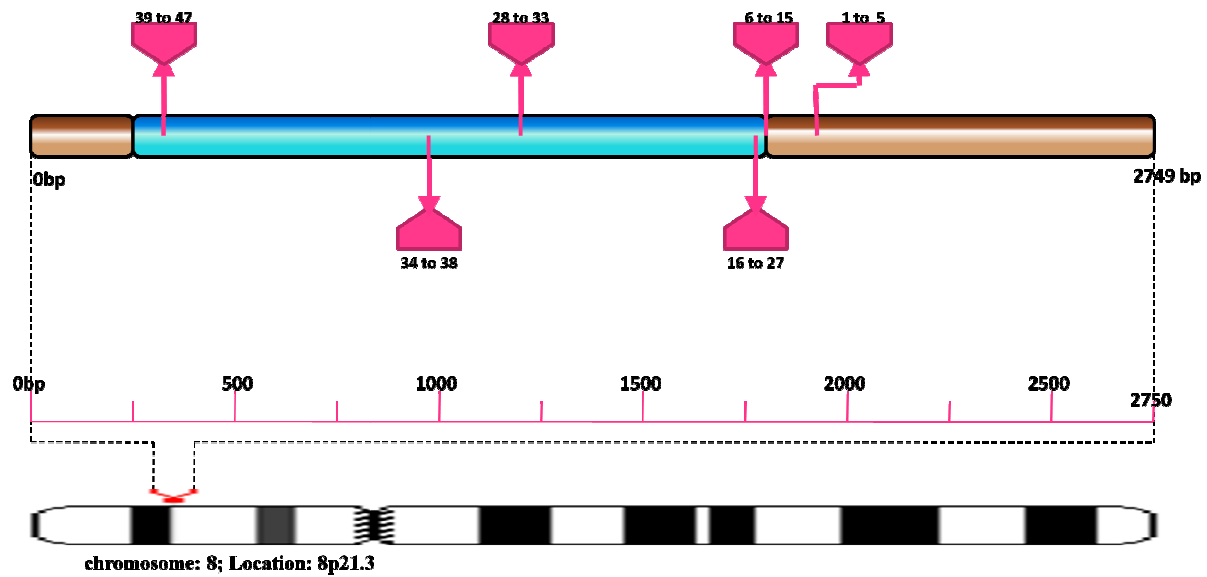

**Fig SF 46 - Schematic representation of MIRNA target site hotspots on SLC18A1**

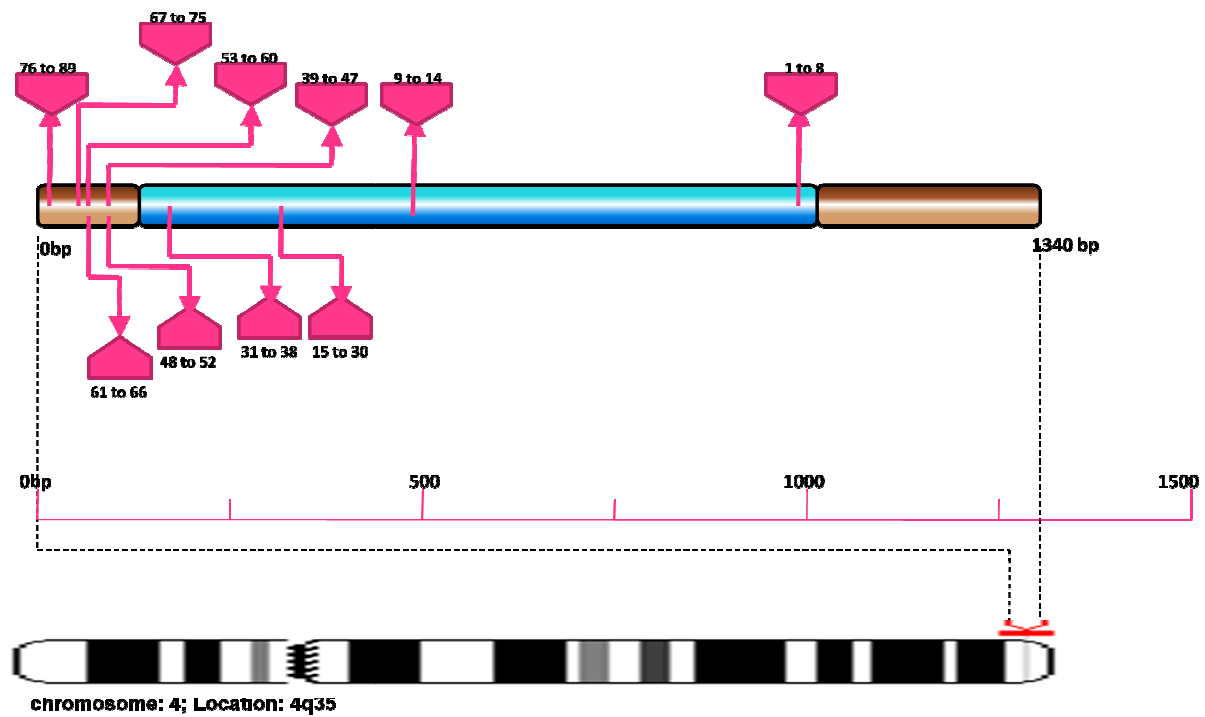

**Fig SF47 - Schematic representation of miRNA target site hotspots on SLC25A4**

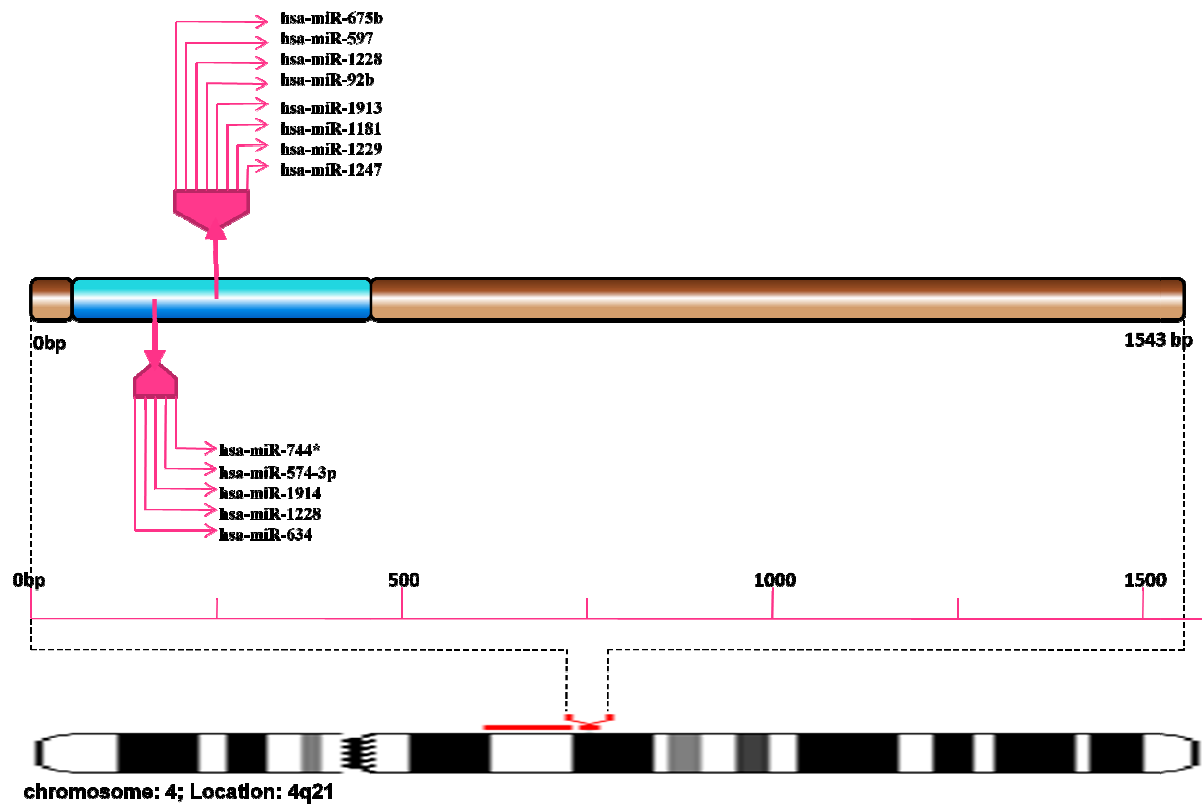

**Fig SF48 - Schematic representation of miRNA target site hotspots on SNCA**

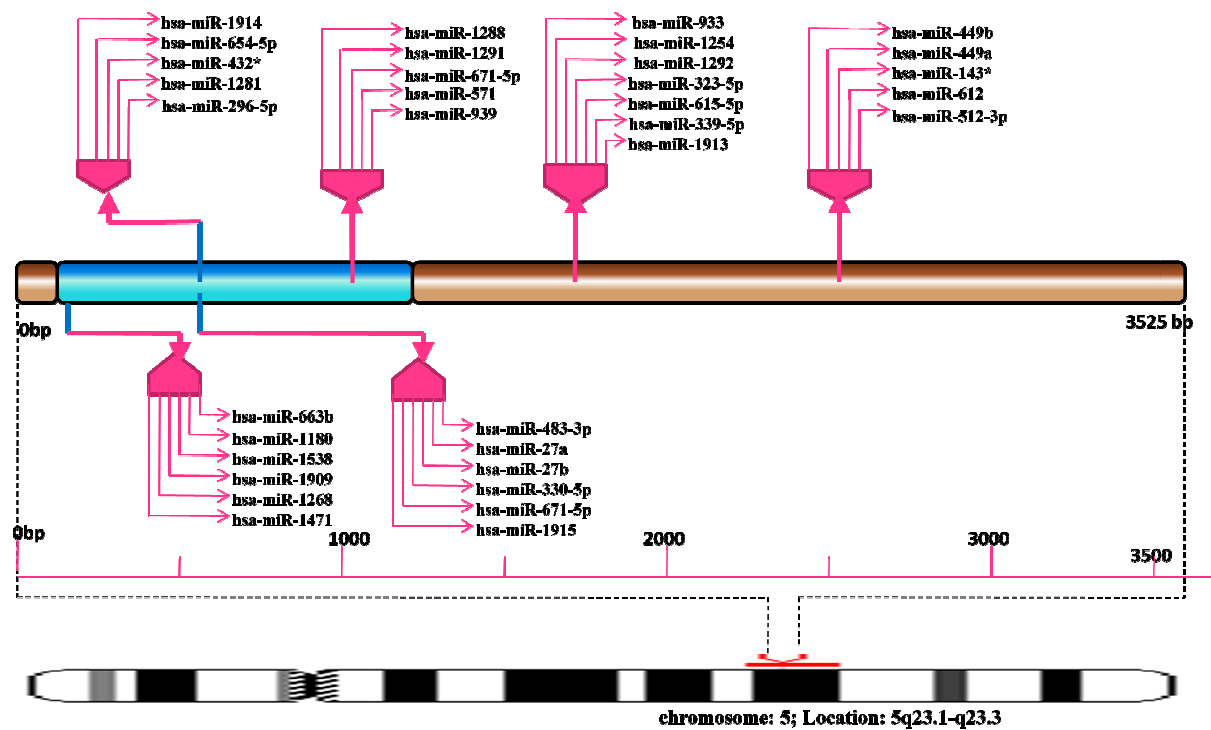

**Fig SF49 - Schematic representation of miRNA target site hotspots on SNCAIP**

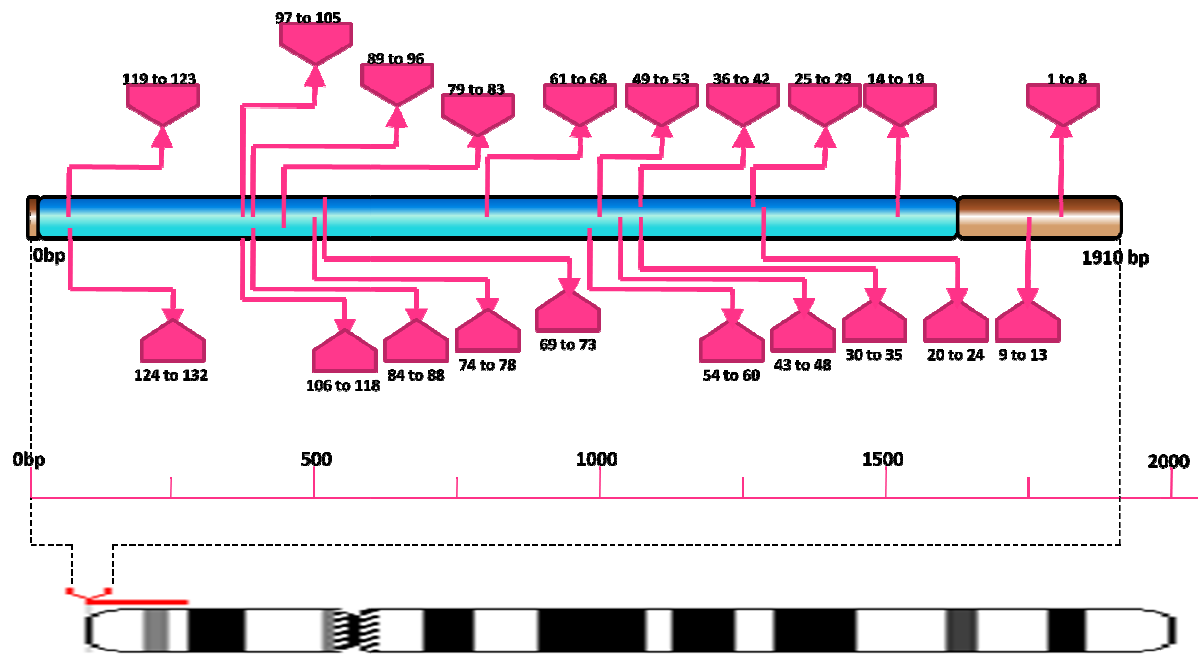

chromosome: 11; Location: 11p15.5

**Fig SF50 - Schematic representation of miRNA target site hotspots on TH**

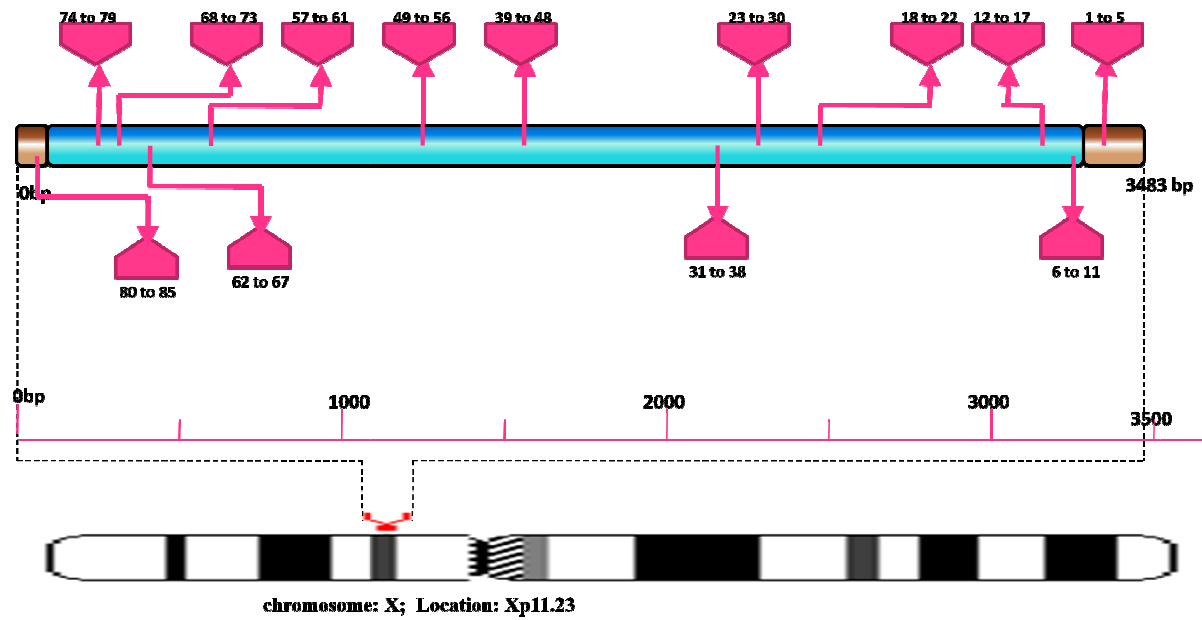

**Fig SF51 - Schematic representation of miRNA target site hotspots on UBE1**

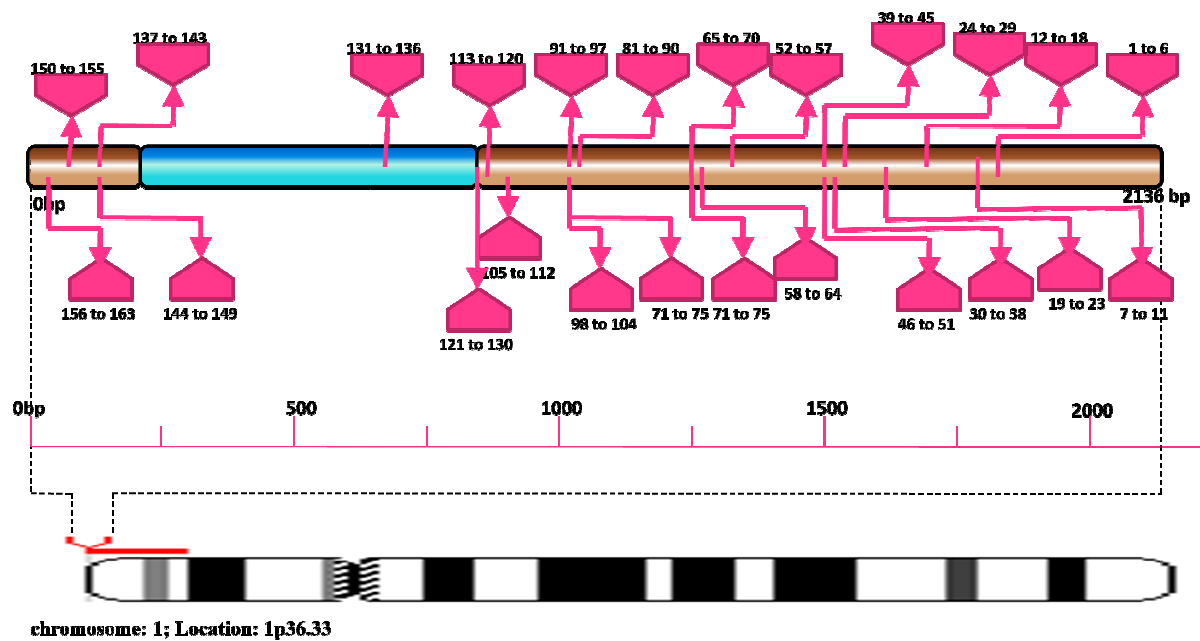

**Fig SF52 - Schematic representation of miRNA target site hotspots on UBE2J2**



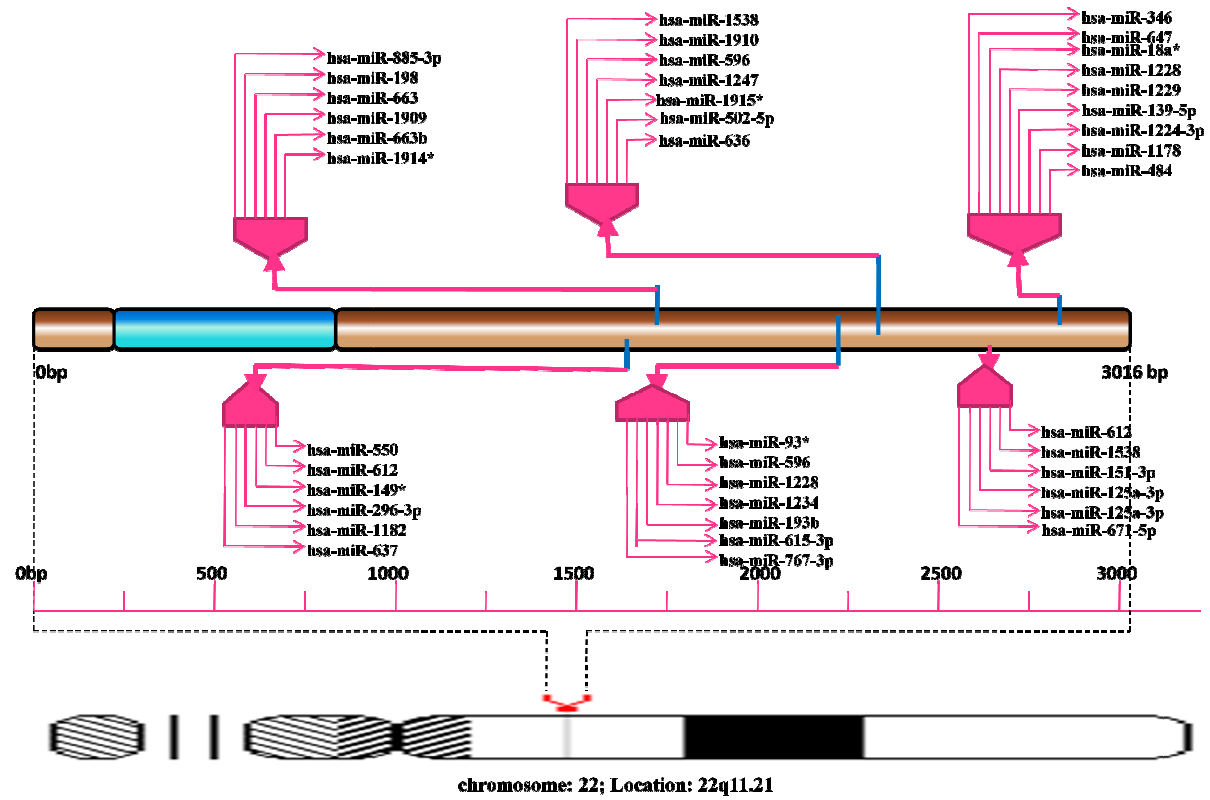

**Fig SF53 - Schematic representation of miRNA target site hotspots on UBE2L3**

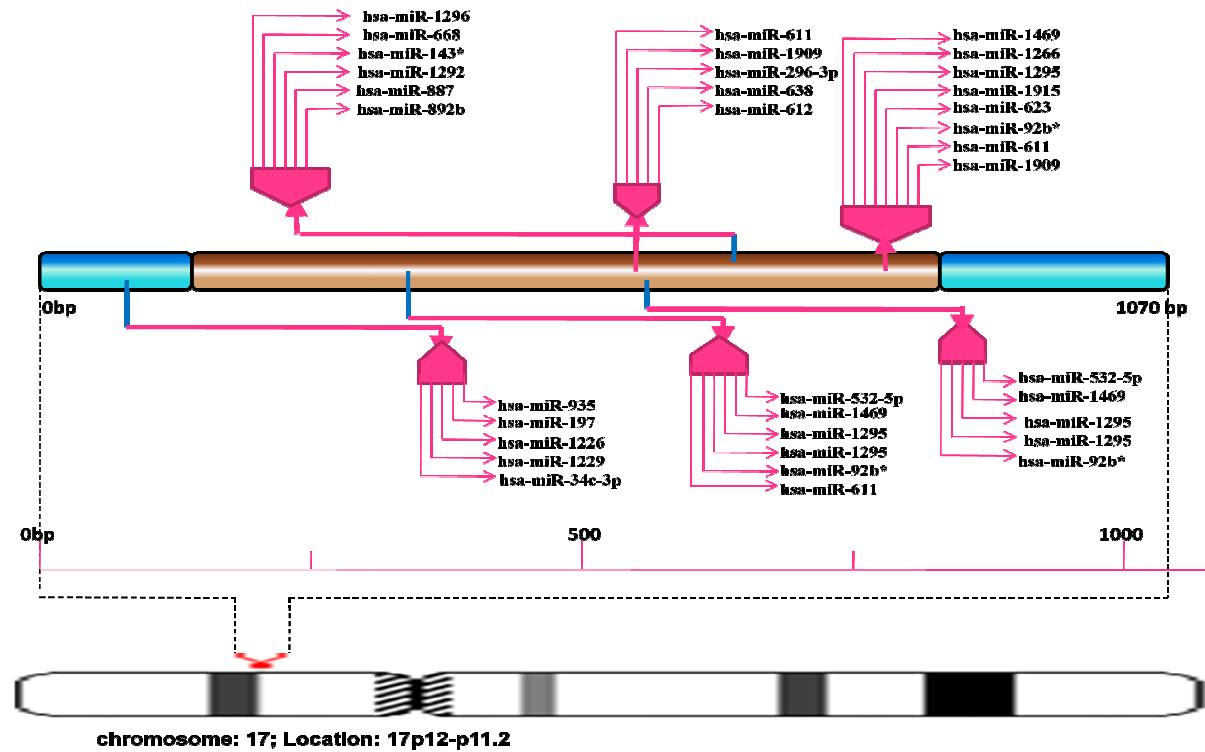

**Fig SF54 - Schematic representation of miRNA target site hotspots on ubiquitinB**

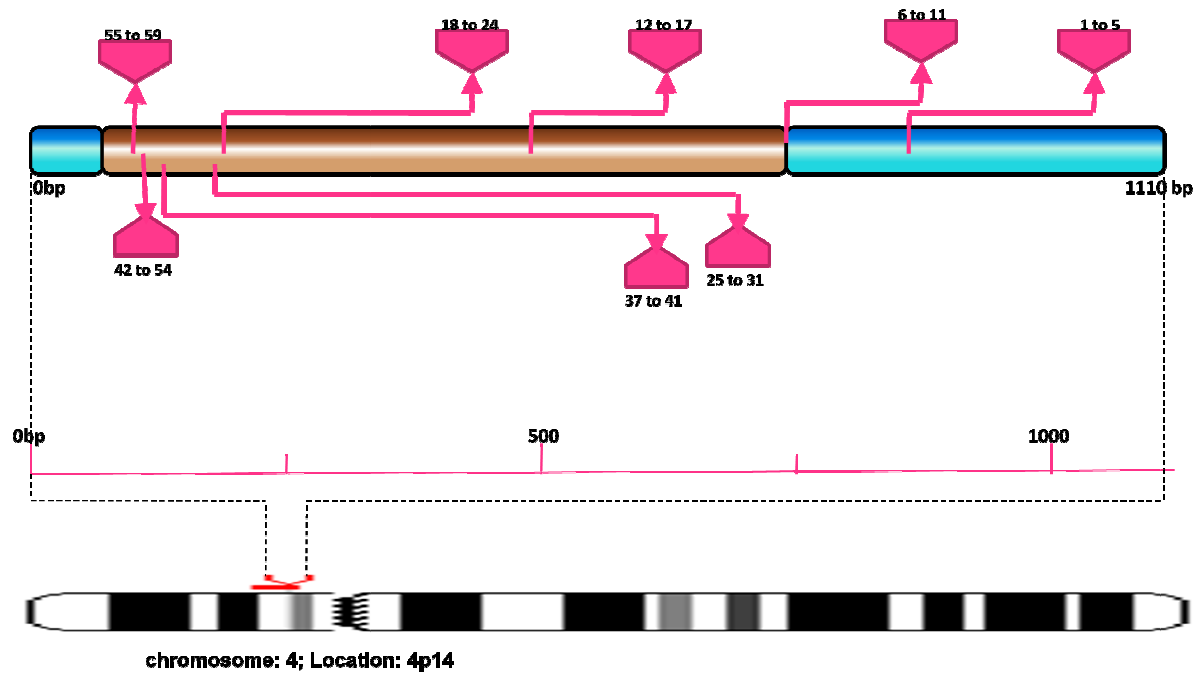

**Fig SF55 - Schematic representation of miRNA target site hotspots on UCHL1**

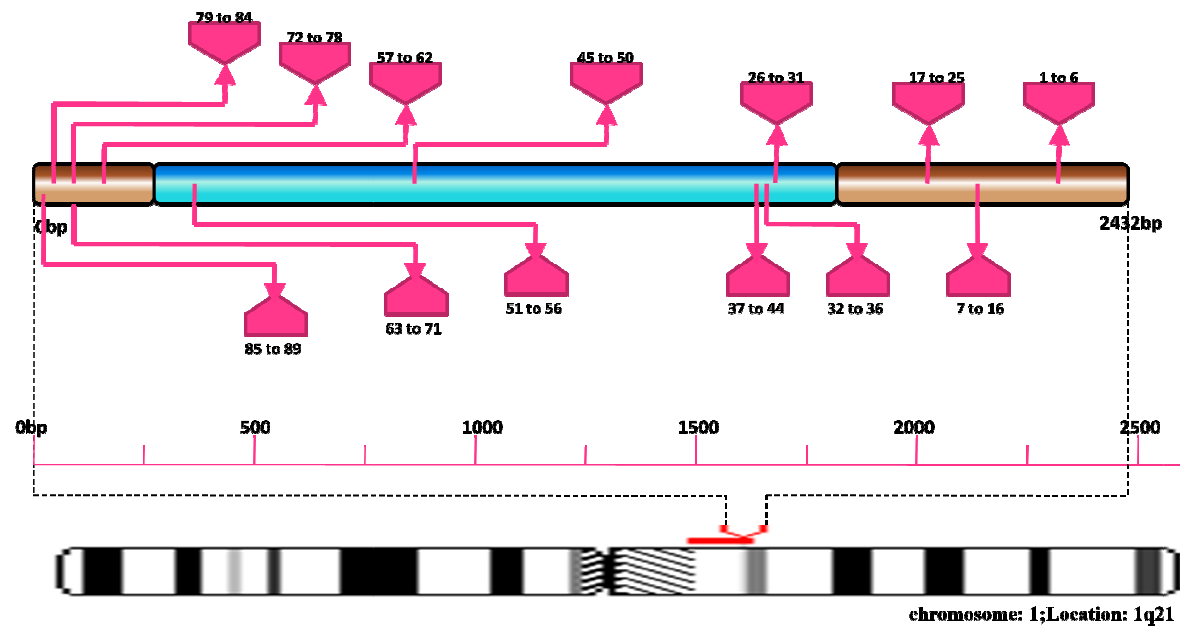

**Fig SF56 - Schematic representation of miRNA target site hotspots on GBA**

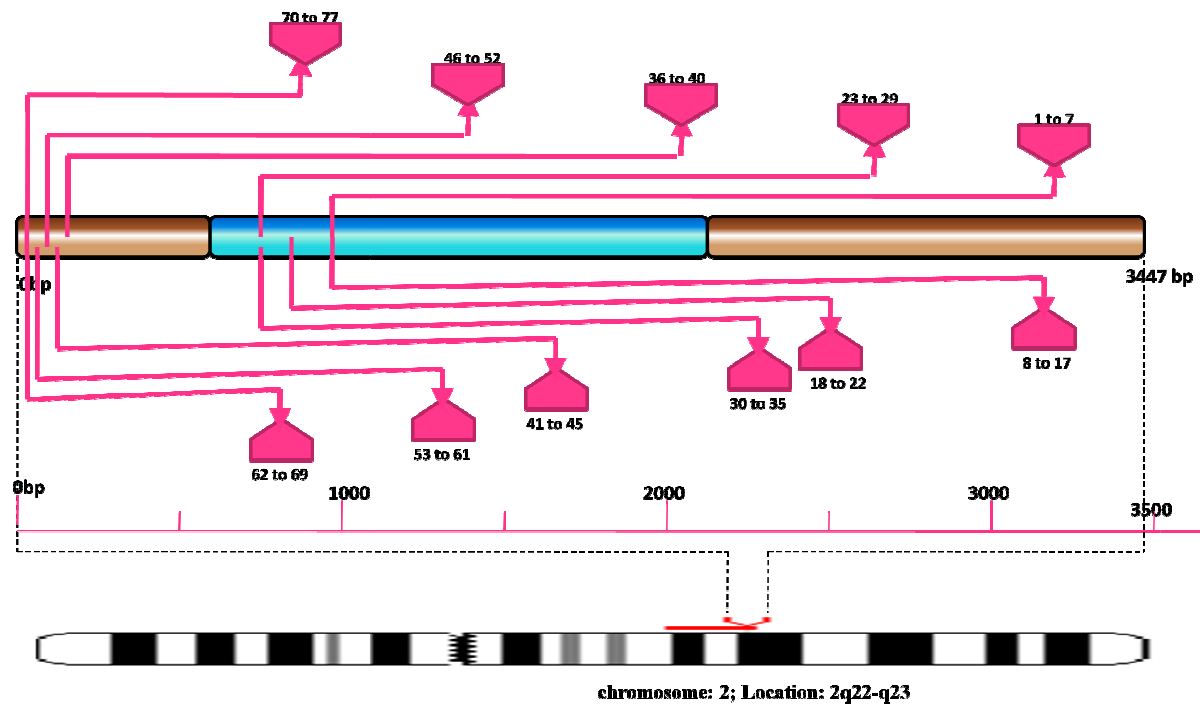

**Fig SF57 - Schematic representation of miRNA target site hotspots on NR4A2**
