# Supplementary material for: Interaction Map and Selection of microRNA Targets in Parkinson′s Disease‐Related Genes
Source: Hindawi journal article supplement (doi:10.1155/2009/363145), 2009-01-01
Supplement: f3 [file 363145.f3.xls]

## Sheet: TableS8
Table S8 : Target site predicted in 5' UTR, CDS and 3' UTR using miRanda for midbrain- specific miRNAs
midbrain- specific miRNA	Target Gene	Start position of target site	End position of target site
hsa-let-7b	COX6B2	1290	1312
	SLC6A3	1308	1337
hsa-let-7d	COX6B2	1290	1312
	PARK7	397	423
hsa-let-7e	APAF1	5285	5309
	APAF1	5420	5445
	APAF1	4987	5011
	SLC25A4	685	707
hsa-let-7i	SLC6A3	2669	2694
	UBE2L3	2844	2867
hsa-miR-103	HTRA2	931	959
	SDHA	668	687
	SDHA	177	195
hsa-miR-107	SLC6A3	3473	3497
hsa-miR-125a-5p	CASP9	223	254
	COX6B2	604	630
	GPR37	1008	1032
	SEPT Five	436	467
	UBE1	2415	2439
hsa-miR-125b	CYCS	2027	2053
	GBA	2186	2208
hsa-miR-127-3p	CASP9	41	65
	CASP9	1	27
	SEPT Five	718	747
	SEPT Five	886	909
	SEPT Five	1597	1625
	SLC25A4	67	92
	UBE1	3103	3126
	UBE2J2	45	67
	NR4A2	10	37
hsa-miR-129-5p	COX6B2	315	337
	GPR37	852	874
	LRRK2	4876	4899
	NDUFS7	638	665
	SEPT Five	1767	1788
	UBE1	1461	1486
hsa-miR-132	UBE1	1521	1544
hsa-miR-134	CASP3	732	752
	CASP3	1624	1644
	COX6B2	1416	1441
	LRRK2	3932	3953
	SLC6A3	3682	3709
	SLC6A3	3764	3791
	SNCAIP	924	951
	UBE1	2276	2296
	UBE1	2715	2735
	ubiquitin	177	203
hsa-miR-136	SEPT Five	2500	2524
hsa-miR-138	COX6B2	1126	1151
	COX6B2	1495	1520
	CYCS	20	45
	GPR37	1924	1946
	APAF1	5331	5356
	LOC100128525	22	41
	PARK2	149	170
	PARK7	531	559
	PINK1	327	349
	SEPT Five	1311	1339
	TH	155	179
	GBA	1362	1385
	GBA	1116	1147
	NR4A2	1033	1064
hsa-miR-139-3p	COX6B2	937	959
	COX6B2	48	73
	GPR37	609	632
	LRRK2	4425	4452
	NDUFS7	156	182
	PARK7	13	41
	PINK1	198	221
	SDHA	1228	1258
	SEPT Five	3463	3484
	SEPT Five	3125	3150
	SEPT Five	2854	2881
	SLC6A3	1333	1355
	SLC6A3	1143	1168
	SLC25A4	795	818
	TH	57	77
	UBE1	109	130
	UBE2J2	1851	1875
	UBE2J2	1618	1647
	UBE2J2	1754	1781
	GBA	159	183
	GBA	90	112
	GBA	26	48
	NR4A2	1038	1060
	NR4A2	1386	1406
	NR4A2	51	71
	NR4A2	18	42
hsa-miR-139-5p	SEPT Five	3045	3071
	TH	494	519
	UBE2L3	2822	2845
hsa-miR-140-3p	TH	1772	1800
	UBE1	2789	2809
	GBA	1732	1756
hsa-miR-140-5p	GBA	2157	2176
hsa-miR-145	HTRA2	285	308
	LRRK2	6732	6765
	PARK2	239	266
	UBE2J2	988	1020
	UCHL1	324	349
	NR4A2	197	224
hsa-miR-149	CASP3	2187	2219
	COX6B2	1560	1584
	GPR37	950	976
	GPR37	1010	1038
	GPR37	1157	1184
	GPR37	1099	1123
	GPR37	1326	1351
	PARK2	664	692
	PARK2	1028	1058
	PARK7	3	28
	PARK7	39	63
	PINK1	1549	1581
	PINK1	1904	1930
	SDHA	1370	1402
	SDHA	1873	1898
	SDHA	457	481
	SEPT Five	2474	2505
	SEPT Five	1747	1776
	SEPT Five	2502	2529
	SEPT Five	1307	1329
	SLC6A3	1260	1285
	SLC6A3	1386	1412
	SLC18A1	1808	1833
	SLC25A4	1	19
	SNCAIP	2898	2920
	TH	1260	1286
	TH	569	600
	TH	253	278
	UBE1	1742	1766
	UBE2J2	1309	1335
	UBE2J2	1653	1674
	UBE2J2	832	855
	UBE2J2	1241	1266
hsa-miR-151-3p	UBE1	2298	2322
	UBE2L3	2632	2654
hsa-miR-154	SEPT Five	2708	2732
hsa-miR-181a	UBE1	254	276
	NR4A2	158	185
hsa-miR-181b	UBE1	248	276
hsa-miR-181c	NR4A2	158	185
hsa-miR-185	CASP9	1008	1031
	SLC18A1	2495	2516
	UBE1	412	435
	GBA	165	187
	GBA	32	51
hsa-miR-191	GBA	133	158
hsa-miR-197	CASP9	134	164
	PINK1	1900	1924
	SEPT Five	923	947
	SLC18A1	1804	1828
	UBE1	1563	1588
	ubiquitin	84	105
hsa-miR-204	SEPT Five	2453	2479
hsa-miR-222	PINK1	1592	1615
	UBE1	1237	1261
	NR4A2	896	916
hsa-miR-24	PINK1	113	140
	SLC6A3	1786	1812
	GBA	2258	2286
hsa-miR-25	CASP9	1055	1078
	CYCS	2652	2675
	CYCS	3060	3082
	HTRA2	613	638
	APAF1	5228	5250
	APAF1	4931	4952
	NDUFS7	7	30
	UBE1	2721	2743
hsa-miR-27a	CASP3	1337	1362
	APAF1	4180	4202
	SNCAIP	558	578
hsa-miR-27b	CASP3	1340	1362
	CASP3	1340	1362
	LRRK2	5157	5180
	SNCAIP	558	578
	NR4A2	2204	2223
hsa-miR-28-5p	SLC6A3	3537	3558
	GBA	1391	1413
hsa-miR-31	LRRK2	3613	3637
	SLC18A1	1277	1300
	UCHL1	183	205
hsa-miR-323-3p	UBE2J2	1296	1316
hsa-miR-329	CYCS	3907	3927
hsa-miR-330-3p	SLC18A1	1181	1203
	TH	865	885
	TH	313	333
	UBE1	2430	2454
hsa-miR-338-3p	PARK2	972	997
	PINK1	1384	1407
	SLC6A3	490	519
hsa-miR-345	CASP9	231	260
	CASP9	275	302
	COX6B2	736	763
	PINK1	833	859
	SEPT Five	1749	1775
	SEPT Five	1838	1865
	SLC6A3	1385	1411
	TH	1349	1374
	UBE1	1866	1888
	UBE2J2	440	467
	UBE2L3	42	66
	UCHL1	116	134
	GBA	2149	2170
	NR4A2	360	384
hsa-miR-34c-3p	PINK1	1885	1910
	SLC18A1	972	993
	UBE2J2	1298	1322
	ubiquitin	81	107
hsa-miR-363	CASP9	1095	1115
	UBE2L3	1412	1436
hsa-miR-378	GPR37	2259	2283
	HTRA2	730	752
hsa-miR-379	GPR37	1433	1457
hsa-miR-423-3p	CASP9	612	632
	CASP9	29	58
	COX6B2	613	638
	GPR37	1871	1894
	HTRA2	618	644
	HTRA2	577	602
	HTRA2	787	814
	LOC100128525	126	148
	LRRK2	1214	1239
	PARK2	709	733
	PARK7	547	569
	PINK1	247	277
	PINK1	1005	1036
	PINK1	65	89
	PINK1	219	241
	PINK1	366	391
	PINK1	694	719
	SEPT Five	1391	1411
	SEPT Five	2166	2198
	SEPT Five	896	917
	SEPT Five	541	564
	SLC6A3	3503	3528
	SLC6A3	3122	3156
	SLC25A4	51	78
	SLC25A4	96	124
	SNCAIP	2004	2028
	SNCAIP	1671	1702
	TH	1547	1570
	TH	1323	1347
	TH	826	855
	UBE1	2178	2203
	UBE1	2020	2046
	UBE1	1220	1248
	UBE1	1220	1248
	UBE1	316	345
	UBE2J2	866	892
	UBE2J2	1519	1548
	UBE2J2	829	856
	UBE2J2	1318	1347
	UBE2J2	1826	1854
	GBA	617	642
	GBA	506	530
hsa-miR-432	CASP3	1004	1029
	COX6B2	699	728
	GPR37	1227	1250
	HTRA2	1597	1622
	LOC100133737	148	176
	NDUFS7	573	601
	SLC25A4	377	408
	SNCAIP	1893	1917
	UBE1	1316	1337
hsa-miR-433	LOC100128525	543	568
	NDUFS7	99	118
	PARK2	382	404
	SDHA	1575	1601
	SEPT Five	478	508
	SEPT Five	1090	1118
	TH	84	112
	UBE1	1328	1358
hsa-miR-486-5p	PARK7	612	632
	PINK1	2239	2266
	SEPT Five	341	365
	SLC18A1	1802	1827
	UBE1	948	974
	UBE1	726	752
	UBE2L3	1397	1418
hsa-miR-487a	PINK1	1831	1858
hsa-miR-487b	UBE2J2	1054	1082
hsa-miR-519c-5p	SLC6A3	3789	3820
	SLC18A1	1788	1810
hsa-miR-652	CASP9	1301	1323
	UBE1	2292	2313
	UBE2J2	734	757
hsa-miR-654-5p	COX6B2	364	392
	GPR37	838	865
	GPR37	620	648
	LOC100128525	44	62
	NDUFS7	244	268
	PARK2	1305	1333
	PINK1	74	96
	SEPT Five	2623	2653
	SLC6A3	1850	1875
	SNCAIP	574	597
	TH	1114	1138
	UBE1	2203	2226
	UBE2J2	155	175
	ubiquitin	9	30
	GBA	1845	1868
hsa-miR-744	LOC100128525	393	416
	NDUFS7	28	52
	NDUFS7	338	368
	SEPT Five	2629	2653
	SEPT Five	2813	2838
	SLC25A4	18	42
	SNCAIP	75	98
	TH	826	850
	TH	1714	1741
	UBE1	1116	1142
	UBE1	1180	1204
	UBE1	1454	1479
	UBE2J2	1011	1032
	UBE2J2	1833	1859
	UBE2L3	2251	2275
	UCHL1	217	242
	NR4A2	2250	2271
	NR4A2	1593	1620
hsa-miR-760	CASP3	2200	2223
	CASP9	564	589
	COX6B2	129	152
	COX6B2	251	273
	COX6B2	961	981
	GPR37	1403	1426
	GPR37	783	807
	LOC100128525	199	224
	LOC100128525	555	576
	NDUFS7	178	197
	NDUFS7	430	453
	NDUFS7	152	175
	PARK2	1294	1317
	SDHA	1798	1820
	SEPT Five	709	732
	SEPT Five	1300	1321
	SEPT Five	1274	1297
	SEPT Five	1120	1144
	SEPT Five	76	98
	SLC6A3	168	192
	SLC18A1	1750	1775
	SNCAIP	548	568
	SNCAIP	119	140
	TH	456	476
	TH	1064	1091
	TH	291	312
	UBE1	2771	2792
	UBE1	2404	2425
	UBE1	2290	2311
	UBE1	2086	2108
	UBE1	1420	1440
	UBE2J2	1806	1828
	UBE2J2	825	852
	UBE2J2	703	725
	UBE2J2	198	218
	UBE2L3	1064	1084
	UCHL1	478	502
	UCHL1	867	890
	GBA	988	1010
	GBA	16	40
	NR4A2	934	955
hsa-miR-92a	CASP3	14	37
	COX6B2	1260	1287
	NDUFS7	6	30
	SEPT Five	132	156
	SLC6A3	3547	3576
	GBA	1436	1466
hsa-miR-92b	CASP3	13	37
	HTRA2	614	638
	HTRA2	90	117
	LRRK2	2495	2525
	SLC6A3	3549	3576
	SNCA	245	272
	GBA	1439	1466
hsa-miR-93	LRRK2	6529	6554
	UBE1	668	690
	NR4A2	3126	3147
hsa-miR-99b	GPR37	876	900
	SLC6A3	1600	1626

## Sheet: Table S9
Table S9: Target site predicted in 3' UTR for midbrain- specific miRNA using TargetScan
midbrain-specific miRNA	Target Gene	Start position of target site	End position of target site
hsa-let-7a	CASP3	152	158
	COX6B2	83	89
	APAF1	935	941
	SLC25A4	130	136
hsa-let-7b	CASP3	152	158
	COX6B2	83	89
	APAF1	935	941
	SLC25A4	130	136
hsa-let-7c	CASP3	152	158
	COX6B2	83	89
	APAF1	935	941
	SLC25A4	130	136
hsa-let-7d	CASP3	152	158
	COX6B2	83	89
	APAF1	935	941
	SLC25A4	130	136
hsa-let-7e	CASP3	152	158
	COX6B2	83	89
	APAF1	935	941
	SLC25A4	130	136
hsa-let-7f	CASP3	152	158
	COX6B2	83	89
	APAF1	935	941
	SLC25A4	130	136
hsa-let-7g	CASP3	152	158
	COX6B2	83	89
	APAF1	935	941
	SLC25A4	130	136
hsa-let-7i	CASP3	152	158
	COX6B2	83	89
	APAF1	935	941
	SLC25A4	130	136
hsa-miR-101	APAF1	259	265
hsa-miR-103	COX6B2	458	464
	PARK2	2013	2019
	SEPTFIVE	369	375
	SLC6A3	1790	1796
	TH	225	231
	UBE2L3	2369	2375
hsa-miR-107	COX6B2	458	464
	PARK2	2013	2019
	SEPTFIVE	369	375
	SLC6A3	1790	1796
	TH	225	231
	UBE2L3	2369	2375
hsa-miR-124	CASP9	18	24
	CYCS	11	17
	PINK1	637	643
hsa-miR-125a-5p	CYCS	1582	1588
	APAF1	380	386
	UBE2L3	2035	2041
hsa-miR-125b	CYCS	1582	1588
	APAF1	380	386
	UBE2L3	2035	2041
hsa-miR-129-5p	PARK2	2462	2468
	PARK2	2485	2491
	PARK2	801	807
	NR4A2	642	648
hsa-miR-130a	CASP9	307	313
	APAF1	462	468
	APAF1	896	902
	LRRK2	506	512
	ubiquitinB	45	51
hsa-miR-132	APAF1	2259	2265
	APAF1	2324	2330
	APAF1	361	367
	SEPTFIVE	62	68
	SLC6A3	154	160
	GBA	376	382
	NR4A2	1011	1017
hsa-miR-134	PARK7	136	142
	NR4A2	61	67
hsa-miR-136	CYCS	1225	1231
	APAF1	1834	1840
	APAF1	881	887
	SLC6A3	491	497
hsa-miR-138	CASP3	758	764
	COX6B2	116	122
	COX6B2	693	699
	HTRA2	118	124
	SNCAIP	176	182
	GBA	493	499
hsa-miR-139-3p	PARK2	1580	1586
hsa-miR-139-5p	CYCS	736	742
	APAF1	1239	1245
hsa-miR-140-3p	CYCS	1122	1128
	SEPTFIVE	694	700
	SEPTFIVE	984	990
	TH	184	190
	TH	292	298
	UBE2L3	782	788
hsa-miR-140-5p	CASP9	488	494
	COX6B2	1071	1077
	PARK2	1297	1303
hsa-miR-143	APAF1	2271	2277
hsa-miR-144	APAF1	343	349
hsa-miR-145	APAF1	1908	1914
	SLC6A3	1216	1222
	GBA	369	375
	NR4A2	25	31
hsa-miR-149	COX6B2	540	546
	SNCAIP	50	56
	UBE2L3	2101	2107
	UBE2L3	937	943
hsa-miR-152	PARK2	1451	1457
	TH	228	234
	TH	43	49
hsa-miR-15a	SLC18A1	586	592
	GBA	251	257
hsa-miR-16	SLC18A1	586	592
	GBA	251	257
hsa-miR-17	PARK2	2216	2222
	NR4A2	1061	1067
hsa-miR-181a	PARK2	695	701
	PARK2	702	708
	SLC25A4	266	272
hsa-miR-181b	PARK2	695	701
	PARK2	702	708
	SLC25A4	266	272
hsa-miR-181c	PARK2	695	701
	PARK2	702	708
	SLC25A4	266	272
hsa-miR-185	PARK2	1023	1029
	UBE1	38	44
	UBE2J2	38	44
	UBE2L3	1008	1014
	UBE2L3	2114	2120
hsa-miR-186	CYCS	667	673
	APAF1	1539	1545
	NR4A2	1248	1254
hsa-miR-191	SEPTFIVE	778	784
hsa-miR-195	SLC18A1	586	592
	GBA	251	257
hsa-miR-197	COX6B2	240	246
	PINK1	17	23
	SDHA	12	18
	SEPTFIVE	825	831
	TH	166	172
	TH	186	192
hsa-miR-19b	APAF1	461	467
	LRRK2	505	511
	PARK2	2533	2539
	SLC6A3	578	584
hsa-miR-204	APAF1	2009	2015
	PARK2	1766	1772
	GBA	43	49
	NR4A2	668	674
	NR4A2	867	873
hsa-miR-21	APAF1	2039	2045
hsa-miR-22	SLC6A3	1623	1629
	GBA	510	516
hsa-miR-222	CYCS	1542	1548
	CYCS	1592	1598
	APAF1	154	160
	PARK2	1446	1452
	SLC6A3	1845	1851
hsa-miR-23a	COX6B2	1144	1150
	CYCS	1332	1338
	CYCS	346	352
	APAF1	1474	1480
	APAF1	2166	2172
	APAF1	238	244
	SLC18A1	859	865
	SLC25A4	268	274
	GBA	233	239
hsa-miR-23b	COX6B2	1144	1150
	CYCS	1332	1338
	CYCS	346	352
	APAF1	1474	1480
	APAF1	2166	2172
	APAF1	238	244
	SLC18A1	859	865
	SLC25A4	268	274
	GBA	233	239
hsa-miR-24	COX6B2	1051	1057
	CYCS	2035	2041
	CYCS	2419	2425
	APAF1	1149	1155
	APAF1	846	852
	SEPTFIVE	625	631
	SEPTFIVE	712	718
	SLC18A1	71	77
hsa-miR-25	CYCS	2204	2210
	PARK2	330	336
hsa-miR-26a	APAF1	1342	1348
	PARK2	2378	2384
	UBE2L3	1226	1232
hsa-miR-26b	APAF1	1342	1348
	PARK2	2378	2384
	UBE2L3	1226	1232
hsa-miR-27a	APAF1	2151	2157
	PINK1	62	68
	SLC6A3	1302	1308
	SLC6A3	1610	1616
hsa-miR-27b	APAF1	2151	2157
	PINK1	62	68
	SLC6A3	1302	1308
	SLC6A3	1610	1616
hsa-miR-28-5p	COX6B2	393	399
	HTRA2	548	554
	PARK2	219	225
hsa-miR-29a	CYCS	764	770
	CYCS	993	999
	GPR37	234	240
hsa-miR-29b	CYCS	764	770
	CYCS	993	999
	GPR37	234	240
hsa-miR-29c	CYCS	764	770
	CYCS	993	999
	GPR37	234	240
hsa-miR-30a	CASP3	1187	1193
	CYCS	1004	1010
	CYCS	222	228
	APAF1	2139	2145
	SLC6A3	1366	1372
	SLC6A3	157	163
	NR4A2	1276	1282
hsa-miR-30c	CASP3	1187	1193
	CYCS	1004	1010
	CYCS	222	228
	APAF1	2139	2145
	SLC6A3	1366	1372
	SLC6A3	157	163
	NR4A2	1276	1282
hsa-miR-30d	CASP3	1187	1193
	CYCS	1004	1010
	CYCS	222	228
	APAF1	2139	2145
	SLC6A3	1366	1372
	SLC6A3	157	163
	NR4A2	1276	1282
hsa-miR-30e	CASP3	1187	1193
	CYCS	1004	1010
	CYCS	222	228
	APAF1	2139	2145
	SLC6A3	1366	1372
	SLC6A3	157	163
	NR4A2	1276	1282
hsa-miR-31	SDHA	151	157
	UBE1	138	144
	UBE2J2	138	144
	UBE2L3	418	424
hsa-miR-32	CYCS	2204	2210
	PARK2	330	336
hsa-miR-323-3p	CYCS	259	265
	APAF1	14	20
	APAF1	152	158
	PARK2	525	531
	PARK2	734	740
	SLC18A1	322	328
	SLC18A1	857	863
	NR4A2	327	333
	NR4A2	724	730
hsa-miR-329	COX6B2	920	926
	PARK2	273	279
	SLC18A1	37	43
	UBE2L3	1676	1682
	UBE2L3	728	734
hsa-miR-330-3p	APAF1	600	606
	GBA	258	264
hsa-miR-338-3p	CYCS	1278	1284
	PARK2	1464	1470
	SLC18A1	666	672
hsa-miR-338-5p	APAF1	488	494
	UBE2L3	1265	1271
hsa-miR-340	CYCS	1397	1403
	APAF1	81	87
	PINK1	749	755
	UBE2L3	592	598
	NR4A2	777	783
hsa-miR-342-3p	COX6B2	1138	1144
	CYCS	2416	2422
	SDHA	211	217
	SLC6A3	292	298
	UBE2L3	79	85
	GBA	100	106
	NR4A2	83	89
hsa-miR-345	PINK1	81	87
	GBA	52	58
hsa-miR-363	CYCS	2204	2210
	PARK2	330	336
hsa-miR-365	PARK7	212	218
	ubiquitinB	35	41
	GBA	36	42
	NR4A2	210	216
hsa-miR-374a	CYCS	507	513
	NR4A2	734	740
hsa-miR-374b	CYCS	507	513
	NR4A2	734	740
hsa-miR-378	PARK2	1829	1835
hsa-miR-379	APAF1	1224	1230
	PARK2	50	56
hsa-miR-383	APAF1	1766	1772
	PARK2	1839	1845
hsa-miR-409-5p	UBE2L3	217	223
hsa-miR-410	CYCS	332	338
	HTRA2	163	169
	NR4A2	736	742
hsa-miR-423-3p	UBE2L3	975	981
hsa-miR-425	SDHA	69	75
hsa-miR-432	APAF1	1696	1702
hsa-miR-433	CYCS	868	874
	CYCS	95	101
hsa-miR-451	UBE2L3	389	395
hsa-miR-454	CASP9	307	313
	APAF1	462	468
	APAF1	896	902
	LRRK2	506	512
	ubiquitinB	45	51
hsa-miR-486-5p	CYCS	1694	1700
	PINK1	586	592
hsa-miR-487a	COX6B2	161	167
hsa-miR-539	CYCS	2144	2150
	CYCS	2442	2448
	APAF1	1233	1239
	PARK7	154	160
	SLC6A3	1227	1233
	SLC18A1	656	662
	NR4A2	812	818
hsa-miR-628-5p	CASP9	542	548
	PINK1	404	410
	SLC6A3	1715	1721
	SLC6A3	1797	1803
	UBE2L3	2080	2086
	GBA	426	432
hsa-miR-654-5p	COX6B2	1013	1019
	COX6B2	514	520
	UBE2L3	2339	2345
hsa-miR-744	UBE2L3	114	120
	UBE2L3	1378	1384
hsa-miR-760	PARK2	257	263
hsa-miR-9	PARK2	563	569
hsa-miR-92a	CYCS	2204	2210
	PARK2	330	336
hsa-miR-92b	CYCS	2204	2210
	PARK2	330	336
hsa-miR-93	PARK2	2216	2222
	NR4A2	1061	1067
hsa-miR-95	NR4A2	928	934
hsa-miR-98	CASP3	152	158
	COX6B2	83	89
	APAF1	935	941
	SLC25A4	130	136

## Sheet: Table S10
Table S10: Target sites predicted in 3' UTR for midbrain-specific miRNA using miRanda
S. No	midbrain-specific miRNA	Target Gene	Start position of target site	End position of target site
1	hsa-let-7b	COX6B2	1290	1312
2	hsa-let-7d	COX6B2	1290	1312
3	hsa-let-7e	APAF1	4987	5011
		APAF1	5285	5309
		APAF1	5420	5445
4	hsa-let-7i	SLC6A3	2669	2694
		UBE2L3	2844	2867
5	hsa-miR-107	SLC6A3	3473	3497
6	hsa-miR-125a-5p	COX6B2	604	630
7	hsa-miR-125b	CYCS	2027	2053
8	hsa-miR-127-3p	SEPTFIVE	1597	1625
9	hsa-miR-129-5p	SEPTFIVE	1767	1788
10	hsa-miR-134	CASP3	1624	1644
		COX6B2	1416	1441
		SLC6A3	3682	3709
		SLC6A3	3764	3791
11	hsa-miR-136	SEPTFIVE	2500	2524
12	hsa-miR-138	COX6B2	1126	1151
		COX6B2	1495	1520
		APAF1	5331	5356
		SEPTFIVE	1311	1339
13	hsa-miR-139-3p	COX6B2	937	959
		SEPTFIVE	2854	2881
		SEPTFIVE	3125	3150
		SEPTFIVE	3463	3484
		UBE2J2	1618	1647
		UBE2J2	1754	1781
		UBE2J2	1851	1875
14	hsa-miR-139-5p	SEPTFIVE	3045	3071
		UBE2L3	2822	2845
15	hsa-miR-140-3p	TH	1772	1800
16	hsa-miR-140-5p	GBA	2157	2176
17	hsa-miR-145	UBE2J2	988	1020
18	hsa-miR-149	CASP3	2187	2219
		COX6B2	1560	1584
		SEPTFIVE	1307	1329
		SEPTFIVE	1747	1776
		SEPTFIVE	2474	2505
		SEPTFIVE	2502	2529
		UBE2J2	1241	1266
		UBE2J2	1309	1335
		UBE2J2	1653	1674
19	hsa-miR-151-3p	UBE2L3	2632	2654
20	hsa-miR-154	SEPTFIVE	2708	2732
21	hsa-miR-185	CASP9	1008	1031
		SLC18A1	2495	2516
22	hsa-miR-204	SEPTFIVE	2453	2479
23	hsa-miR-24	GBA	2258	2286
24	hsa-miR-25	CASP9	1055	1078
		CYCS	2652	2675
		CYCS	3060	3082
		APAF1	4931	4952
		APAF1	5228	5250
25	hsa-miR-27a	CASP3	1337	1362
26	hsa-miR-27b	CASP3	1340	1362
		CASP3	1340	1362
		NR4A2	2204	2223
27	hsa-miR-28-5p	SLC6A3	3537	3558
28	hsa-miR-323-3p	UBE2J2	1296	1316
29	hsa-miR-329	CYCS	3907	3927
30	hsa-miR-342-3p	TH	1772	1802
31	hsa-miR-345	COX6B2	736	763
		SEPTFIVE	1749	1775
		SEPTFIVE	1838	1865
		GBA	2149	2170
32	hsa-miR-34c-3p	UBE2J2	1298	1322
		COX6B2	1282	1311
		SLC6A3	2547	2569
		TH	1817	1846
		UBE2J2	897	918
		GBA	1920	1945
33	hsa-miR-363	CASP9	1095	1115
		UBE2L3	1412	1436
34	hsa-miR-423-3p	COX6B2	613	638
		SEPTFIVE	1391	1411
		SEPTFIVE	2166	2198
		SLC6A3	3122	3156
		SLC6A3	3503	3528
		UBE2J2	866	892
		UBE2J2	1318	1347
		UBE2J2	1519	1548
		UBE2J2	1826	1854
35	hsa-miR-432	CASP3	1004	1029
		COX6B2	699	728
36	hsa-miR-486-5p	UBE2L3	1397	1418
37	hsa-miR-487b	UBE2J2	1054	1082
38	hsa-miR-652	CASP9	1301	1323
39	hsa-miR-654-5p	PARK2	1305	1333
		SEPTFIVE	2623	2653
40	hsa-miR-744	SEPTFIVE	2629	2653
		SEPTFIVE	2813	2838
		TH	1714	1741
		UBE2J2	1011	1032
		UBE2J2	1833	1859
		UBE2L3	2251	2275
		NR4A2	2250	2271
41	hsa-miR-760	CASP3	2200	2223
		COX6B2	961	981
		PARK2	1294	1317
		SEPTFIVE	1274	1297
		SEPTFIVE	1300	1321
		UBE2J2	1806	1828
		UBE2L3	1064	1084
		UCHL1	867	890
42	hsa-miR-92a	COX6B2	1260	1287
	hsa-miR-92b	SLC6A3	3549	3576
43	hsa-miR-93	NR4A2	3126	3147
